# Supplementary material for: Relict high-Andean ecosystems challenge our concepts of naturalness and human impact
Source: PubMed Central journal article supplement (PMC5469861; doi:10.1038/s41598-017-03500-7), 2017-06-13
Supplement: 41598_2017_3500_MOESM1_ESM.pdf [file 41598_2017_3500_MOESM1_ESM.pdf]

Supplementary information for  
**Relict high-Andean ecosystems challenge our concepts of naturalness and human impact**

Steven P. Sylvester<sup>1,2\*</sup>, Felix Heitkamp<sup>3</sup>, Mitsy D.P.V. Sylvester<sup>1,4</sup>, Hermann F. Jungkunst<sup>5</sup>, Harrie J.M. Sipman<sup>6</sup>, Johanna M. Toivonen<sup>7</sup>, Carlos A. Gonzales Inca<sup>8</sup>, Juan C. Ospina<sup>9</sup>, Michael Kessler<sup>1</sup>

<sup>1</sup>Department of Systematic and Evolutionary Botany, University of Zurich, Switzerland.

<sup>2</sup>Department of Geography, Philipps-Universität Marburg, Germany.

<sup>3</sup>Physical Geography, Georg-August-Universität Göttingen, Germany.

<sup>4</sup>Universidad Nacional del San Antonio Abad del Cusco, Cusco, Peru.

<sup>5</sup>Geoecology & Physical Geography, Universität Koblenz-Landau, Germany.

<sup>6</sup>Botanischer Garten und Botanisches Museum Berlin-Dahlem, Freie Universität Berlin, Germany.

<sup>7</sup>Department of Biology, University of Turku, Finland.

<sup>8</sup>Department of Geography and Geology, University of Turku, Finland.

<sup>9</sup>Instituto de Botánica Darwinion (ANCEFN-CONICET), Buenos Aires, Argentina.

\*Correspondence to: [steven\\_sylvester@hotmail.com](mailto:steven_sylvester@hotmail.com).

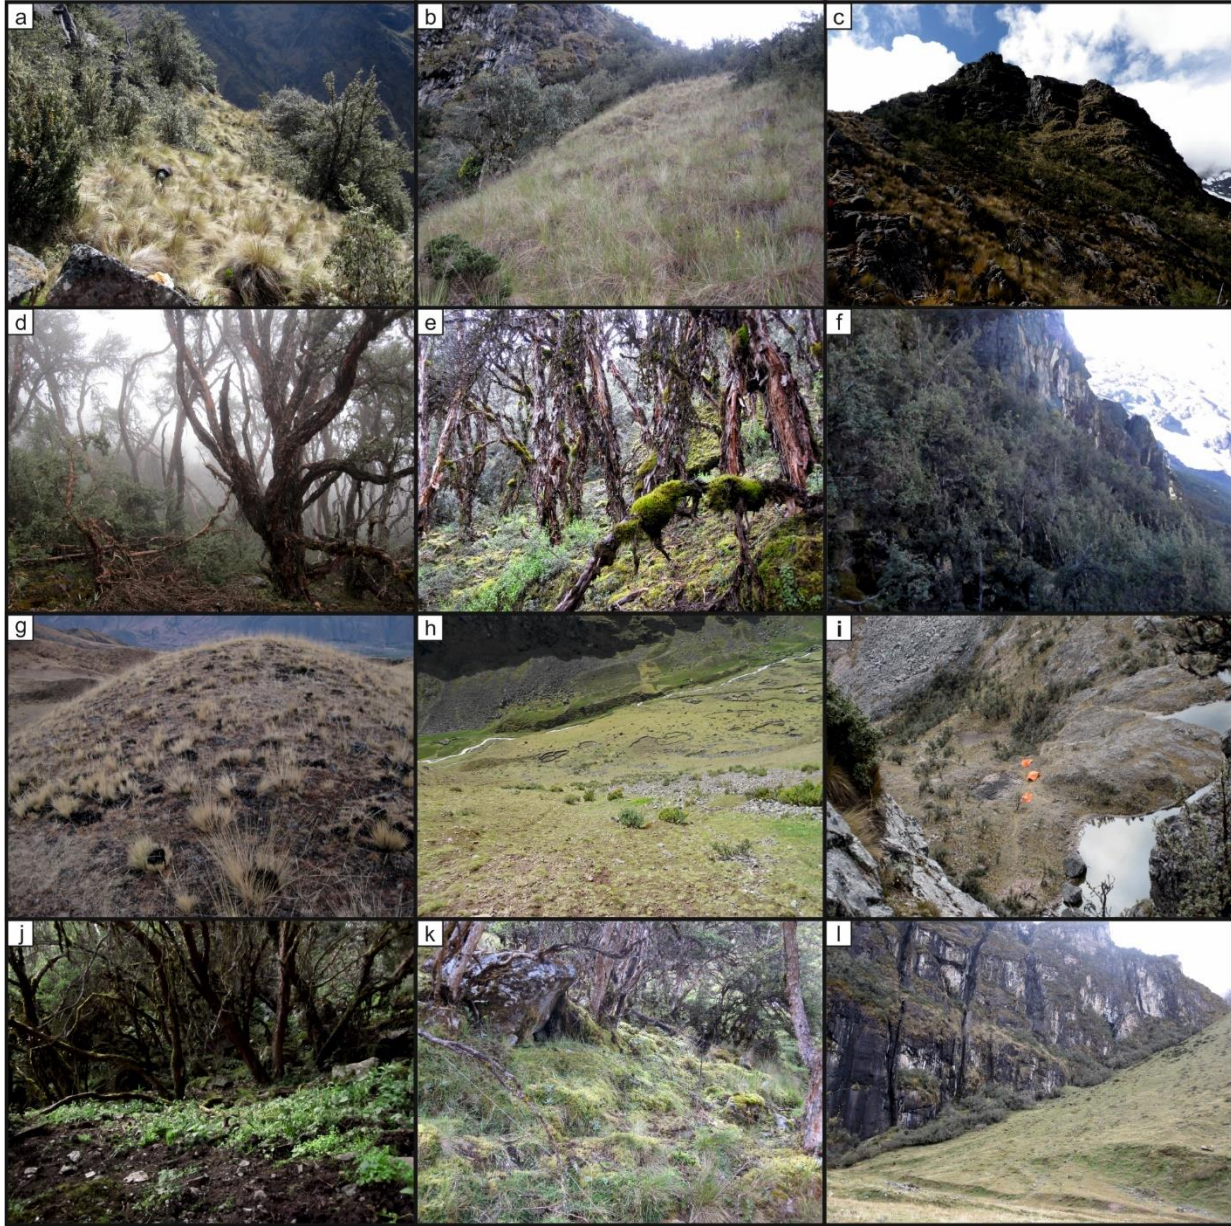

**Fig. S1. Impression of the study sites showing examples of inaccessible (a-f) and accessible (g-l) vegetation.** a, Inaccessible grassland of the Cordillera Urubamba dominated by undescribed tussock grasses, *Calamagrostis* sp. nov. 1 and *Festuca linigluma* J.C. Ospina, S.P. Sylvester and M.D.P.V. Sylvester<sup>29</sup>; b, Inaccessible grassland of the Cordillera Vilcabamba dominated by undescribed tussock grasses, *Calamagrostis* sp. nov. 1 and *Festuca proceroides* J.C. Ospina, S.P. Sylvester and M.D.P.V. Sylvester ined.; c-f, Inaccessible open forest and grassland (c), and closed forest (f) of the Cordillera Vilcabamba dominated by *Polylepis pepeii* and *Gynoxys cuzcoensis* trees, and inaccessible forest stands of the Cordillera Urubamba dominated by *Polylepis subsericans* trees (d-e); g-h, Accessible grassland showing the dominance of short forbs as well as burnt tussocks; i, birds-eye view of an accessible site showing degraded open forest and grassland; j-k, Accessible forest showing either a high level of erosion from trampling by cattle (j) or a dominance of short grazing-adapted forbs (k); l, Example of an accessible forest remnant. Photographs taken by S.P. Sylvester.

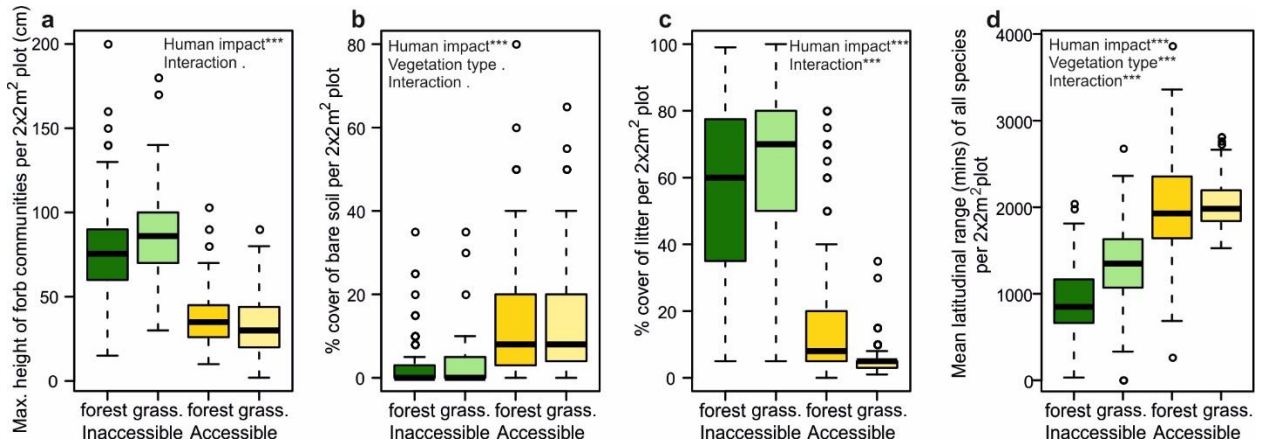

**Fig. S2. Differences in vegetation structure (a-c) and latitudinal range-size of plant species per plot (d) between accessible and inaccessible forest and grassland habitat types. (a-d)** Maximum height of herbaceous vegetation (a), cover of bare soil (b) and litter (c), and average latitudinal amplitude of all plant species (d) per 2x2m<sup>2</sup> plot in the different habitat types. Significant relationships between the structural properties and human impact, found upon analysis using GLMM's, are noted within the plots (\*\*\*)= $p < 0.001$ , . = $p < 0.1$ ; Tables S13). Sample size: Inaccessible forest 160, Inaccessible grassland 83, Accessible forest 118, Accessible grassland 111.



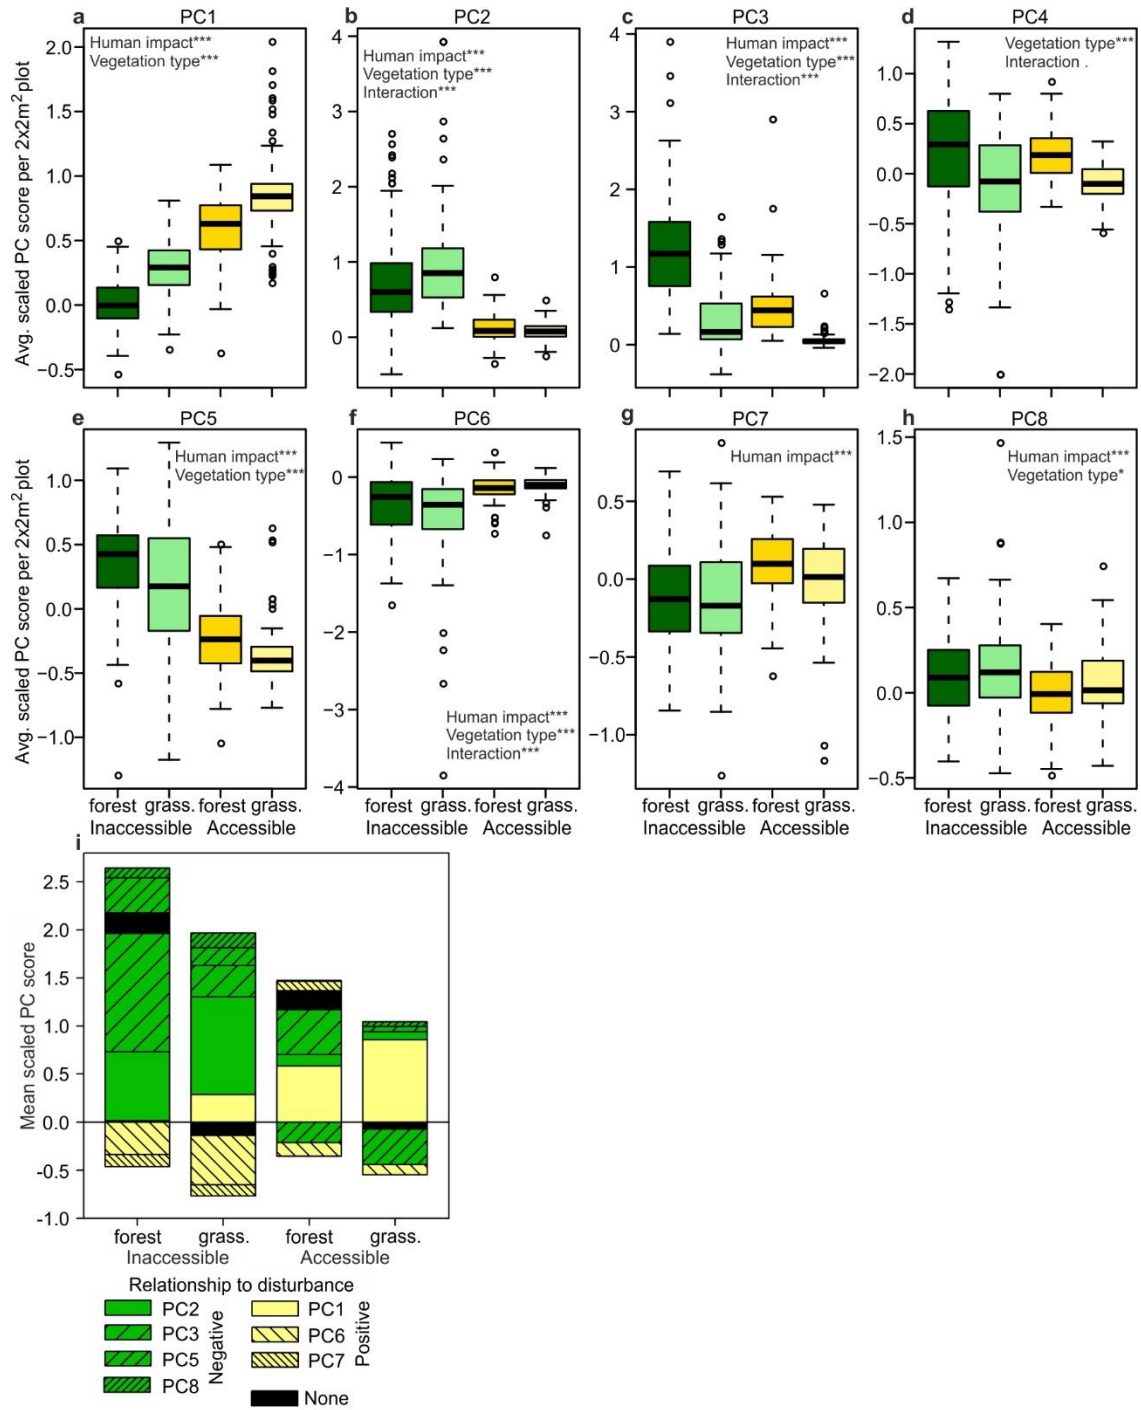

**Fig. S3. Comparison of the scaled principal component (PC) scores, referring to plant trait syndromes (Table S6), averaged over all species per 2x2m<sup>2</sup> plot for the different habitat types. a-h, Differences in the mean scores of each individual PC per plot, between the habitat types. i, Comparison of the means of the 8 scaled principal components, with their relationship to disturbance shown by the colouring green (negative) and light yellow (positive). Significant relationships between the structural properties and human impact, found upon analysis using LMM's, are noted within plots a-h (\*\*\*=p<0.001, \*=p<0.05, . =p<0.1; Table S16). Sample size: Inaccessible forest 160, Inaccessible grassland 83, Accessible forest 118, Accessible grassland 111.**

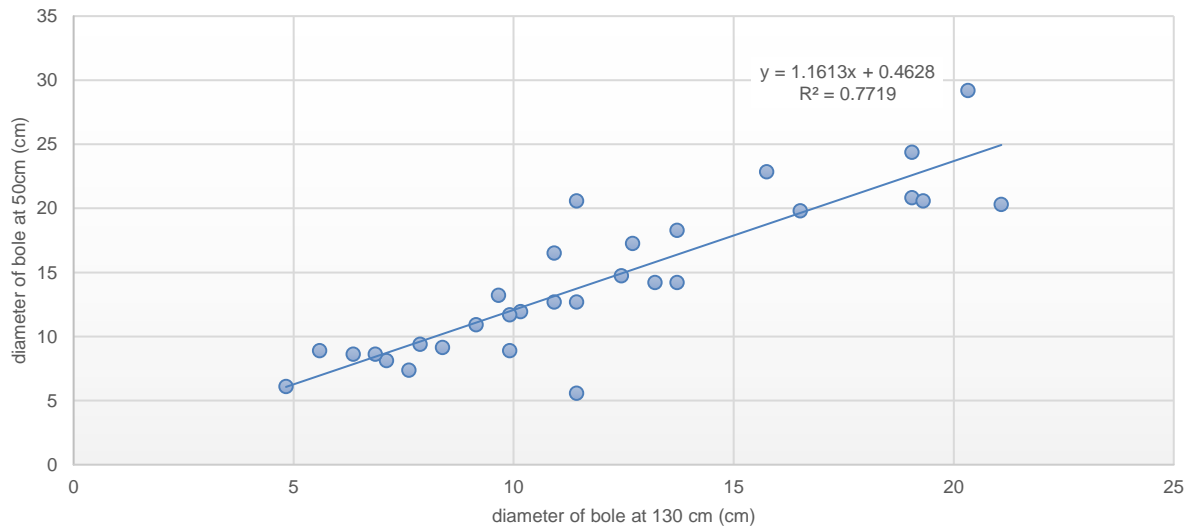

**Fig. S4. Linear model for predicting tree bole diameter at 50cm using dbh values.** To allow our data to be fitted to the allometric equation proposed by Vasquez et al.<sup>74</sup>, who measure tree diameter at 50 cm from the ground, we created a linear model to extrapolate dbh data to that from 50 cm from the ground. To do this, 15 trees of *Polylepis racemosa* and 15 trees of *Polylepis incana* Kunth of different sizes were measured at 130 cm and 50 cm from ground level. These trees were growing in the vicinity of Cusco. Tree bole diameters at 50 and 130 cm were then plotted against each other and used to generate the linear model.

**Table S1. Area and proportion of accessible and inaccessible areas of the Cordillera Urubamba covered by zonal grassland and forest or azonal habitat.**

| Human impact | Class     | Area (m <sup>2</sup> ) | % cover | % zonal vegetation |
|--------------|-----------|------------------------|---------|--------------------|
| Inaccessible | Grassland | 419895                 | 28.23   | 29.67              |
|              | Forest    | 995240                 | 66.90   | 70.33              |
|              | Azonal    | 72496                  | 4.87    |                    |
|              | Total     | 1487631                |         |                    |
| Accessible   | Grassland | 69804605               | 53.22   | 92.49              |
|              | Forest    | 5669958                | 4.32    | 7.51               |
|              | Azonal    | 55697814               | 42.46   |                    |
|              | Total     | 1.31E+08               |         |                    |

**Table S2. Undescribed species and habitat type where predominantly found with associated indicator species analysis<sup>79</sup> (indval) value and specimen information.**

| Family          | New species to science                                                            | Habitat type where predominantly found | indval value   | S.P. Sylvester specimen collection numbers made from study area (specimen duplicates are held in the CUZ, Z and LPB herbaria, amongst others) |
|-----------------|-----------------------------------------------------------------------------------|----------------------------------------|----------------|-----------------------------------------------------------------------------------------------------------------------------------------------|
| Asteraceae      | <i>Senecio</i> sp.nov.                                                            | Inaccessible forest                    | <b>0.13**</b>  | 1458, 1604, 1865, 2111                                                                                                                        |
| Caprifoliaceae  | <i>Valeriana vilcabambensis</i> S.P. Sylvester & Barrie ined.                     | Inaccessible forest                    | <b>0.10***</b> | 240, 1418, 1465, 1519, 1866, 1872, 1879, 2110                                                                                                 |
| Caryophyllaceae | <i>Stellaria</i> sp.nov.                                                          | Inaccessible forest                    | 0.01           | 682, 1688                                                                                                                                     |
| Orobanchaceae   | <i>Bartsia lydiae</i> S.P. Sylvester                                              | Inaccessible forest                    | 0.02           | 127, 464, 680, 815, 878, 939, 1017, 1026, 1407, 1649, 1730, 1754                                                                              |
| Poaceae         | <i>Calamagrostis</i> sp.nov. 1                                                    | Inaccessible forest                    | <b>0.18***</b> | 664, 692, 803, 1015, 1048, 1289, 1290                                                                                                         |
| Poaceae         | <i>Festuca linigluma</i> J.C. Ospina, S.P. Sylvester & M.D.P.V. Sylvester         | Inaccessible forest                    | <b>0.17**</b>  | 745, 778, 802, 871, 890, 1014, 1047, 1100, 1264, 1291, 1325, 1633, 1644, 2244                                                                 |
| Poaceae         | <i>Festuca proceroides</i> J.C. Ospina, S.P. Sylvester & M.D.P.V. Sylvester ined. | Inaccessible forest                    | <b>0.15***</b> | 233, 257, 295, 330, 353, 1420, 1421, 1455, 1506, 1507, 1583, 1848, 1898, 1899, 1902, 1903, 1908, 2120, 2139, 2200                             |
| Poaceae         | <i>Poa urubambensis</i> S.P. Sylvester & Soreng                                   | Inaccessible forest                    | <b>0.07**</b>  | 812, 869, 1317, 1636, 1637, 1695, 403, 1727                                                                                                   |
| Poaceae         | <i>Calamagrostis</i> sp.nov. 2                                                    | Inaccessible grassland                 | 0.01           | 1053, 1067, 1906                                                                                                                              |
| Poaceae         | <i>Festuca calcana</i> J.C. Ospina, S.P. Sylvester & M.D.P.V. Sylvester ined.     | Inaccessible grassland                 | 0.01           | 387, 1204, 1680                                                                                                                               |
| Polypodiaceae   | <i>Moranopteris inaccessa</i> Sundue & S.P. Sylvester                             | Inaccessible grassland                 | 0.01           | 300, 1628a                                                                                                                                    |
| Asteraceae      | <i>Werneria</i> sp.nov.                                                           | Accessible forest                      | <b>0.04*</b>   | 197, 603, 617, 1055, 1078                                                                                                                     |
| Campanulaceae   | <i>Lysipomia mitsyae</i> S.P. Sylvester & D. Quandt                               | Accessible grassland                   | <b>0.27***</b> | 823, 1417                                                                                                                                     |
| Gentianaceae    | <i>Gentianella viridiflora</i> S. Pfanzelt & S.P. Sylvester                       | Accessible grassland                   | <b>0.16***</b> | 1951                                                                                                                                          |
| Iridaceae       | <i>Cardenanthus</i> sp.nov.                                                       | Accessible grassland                   | <b>0.33***</b> | 855, 1383, 1416                                                                                                                               |

Inaccessible forest, where the majority of undescribed species were found, is highlighted in grey. Species with significant ( $p < 0.05$ ) indval values are highlighted in bold. Signif. codes: \*\*\*\*= $p < 0.001$ , \*\*\*= $p < 0.01$ , \*\*= $p < 0.05$ . . Species considered important components of each habitat type were given larger indval values and those seen to be more restricted to a certain habitat type were given higher significance values for that habitat type.

**Table S3. Comparison of indicator plant species and the proportion which are undescribed or introduced**

| Habitat type           | Total No. of indicator species | Proportion of undescribed species as indicators (%) | Proportion of introduced species as indicators (%) |
|------------------------|--------------------------------|-----------------------------------------------------|----------------------------------------------------|
| Inaccessible Forest    | 24                             | 25                                                  | 0                                                  |
| Inaccessible Grassland | 20                             | 0                                                   | 0                                                  |
| Accessible Forest      | 57                             | 3.5                                                 | 10.5                                               |
| Accessible Grassland   | 82                             | 2.4                                                 | 0                                                  |

Comparison between the four habitat types of the number of significant ( $p < 0.05$ ) vascular plant indicator species following indval analysis, and the proportion of this number which are undescribed or introduced. Detailed results are found in Table S4.



**Table S4. Indicator species analysis<sup>79</sup> (indval) values of plants comparing inaccessible and accessible forest and grassland habitat.**

| Inaccessible forest indicator species                                             | indval         | Inaccessible grassland indicator species                                          | indval         |
|-----------------------------------------------------------------------------------|----------------|-----------------------------------------------------------------------------------|----------------|
| <i>Polylepis subsericans</i> J.F.Macbr.                                           | <b>0.31***</b> | <i>Calamagrostis tarmensis</i> Pilg.                                              | <b>0.30***</b> |
| <i>Ourisia chamaedrifolia</i> Benth.                                              | <b>0.21***</b> | <i>Perezia pungens</i> (Bonpl.) Less.                                             | <b>0.14***</b> |
| <i>Luzula gigantea</i> Desv.                                                      | <b>0.21***</b> | <i>Valeriana micropterina</i> Wedd.                                               | <b>0.13***</b> |
| <i>Gynoxys nitida</i> Muschl.                                                     | <b>0.19***</b> | <i>Bartsia thiantha</i> Diels                                                     | <b>0.12***</b> |
| <i>Calamagrostis</i> sp.nov. 1                                                    | <b>0.18***</b> | <i>Baccharis johnwurdackiana</i> H. Rob.                                          | <b>0.12***</b> |
| <i>Pentacalia dictyophlebia</i> (Greenm.) Cuatrec.                                | <b>0.18***</b> | <i>Pernettya prostrata</i> (Cav.) DC.                                             | <b>0.11***</b> |
| <i>Ribes brachybotrys</i> (Wedd.) Jancz.                                          | <b>0.16***</b> | <i>Baccharis tola</i> Phil.                                                       | <b>0.11***</b> |
| <i>Festuca proceroides</i> J.C. Ospina & S.P. Sylvester sp.nov. ined.             | <b>0.15***</b> | <i>Achyrocline alata</i> (Kunth) DC.                                              | <b>0.09***</b> |
| <i>Calamagrostis intermedia</i> (J. Presl) Steud.                                 | <b>0.13***</b> | <i>Calamagrostis recta</i> (Kunth) Trin. ex Steud.                                | <b>0.09***</b> |
| <i>Cerastium subspicatum</i> Wedd.                                                | <b>0.12***</b> | <i>Austrolycopodium magellanicum</i> (P. Beauv.) Holub                            | <b>0.06**</b>  |
| <i>Valeriana vilcabambensis</i> S.P. Sylvester & Barrie sp.nov. ined.             | <b>0.10***</b> | <i>Carex pichinchensis</i> Kunth                                                  | <b>0.10*</b>   |
| <i>Bomarea dulcis</i> (Hook.) Beauverd                                            | <b>0.23*</b>   | <i>Calamagrostis rigida</i> (Kunth) Trin. ex Steud.                               | <b>0.09*</b>   |
| <i>Festuca linigluma</i> J.C. Ospina, S.P. Sylvester & M.D.P.V. Sylvester sp.nov. | <b>0.17*</b>   | <i>Valeriana mandoniana</i> (Wedd.) Höck                                          | <b>0.07*</b>   |
| <i>Senecio praeruptorum</i> Sch. Bip. ex Klatt                                    | <b>0.13*</b>   | <i>Niphogeton dissecta</i> (Benth.) J.F. Macbr.                                   | <b>0.06*</b>   |
| <i>Senecio</i> sp.nov.                                                            | <b>0.13*</b>   | <i>Ranunculus krapfia</i> DC. Ex Deless                                           | <b>0.05*</b>   |
| <i>Gynoxys cuzcoensis</i> Cuatrec.                                                | <b>0.11*</b>   | <i>Misbrookea strigosissima</i> (A. Gray) V.A. Funk                               | <b>0.04*</b>   |
| <i>Chersodoma antennaria</i> (Wedd.) Cabrera                                      | <b>0.10*</b>   | <i>Hieracium streptochaetum</i> Zahn                                              | <b>0.03*</b>   |
| <i>Senecio rhizomatus</i> Rusby                                                   | <b>0.08*</b>   | <i>Senecio melanocalyx</i> Cuatrec.                                               | <b>0.02*</b>   |
| <i>Melpomene peruviana</i> (Desv.) A.R. Sm. & R.C. Moran                          | <b>0.07*</b>   | <i>Lysipomia glandulifera</i> (Schltdl. ex Wedd.) Schltdl. ex E. Wimm.            | <b>0.02*</b>   |
| <i>Oxalis phaeotricha</i> Diels                                                   | <b>0.07*</b>   | <i>Calceolaria virgata</i> Ruiz & Pav.                                            | <b>0.02*</b>   |
| <i>Poa urubambensis</i> S.P.Sylvester & Soreng sp.nov.                            | <b>0.07*</b>   | Berberidaceae sp.1                                                                | 0.02.          |
| <i>Senecio hohenackeri</i> Sch. Bip.                                              | <b>0.07*</b>   | <i>Polystichum cochleatum</i> (Klotzsch) Hieron.                                  | 0.02.          |
| <i>Gentianella scarlatiflora</i> (Gilg) J.S.Pringle                               | <b>0.04*</b>   | <i>Werneria villosa</i> A. Gray                                                   | 0.05           |
| <i>Tristerix longebracteatus</i> (Desr.) Barlow & Wiens                           | <b>0.04*</b>   | <i>Anatherostipa hans-meyeri</i> (Pilg.) Peñail.                                  | 0.04           |
| <i>Poa cf.huancavelicae</i> Tovar                                                 | 0.06.          | <i>Werneria orbignyana</i> Wedd.                                                  | 0.04           |
| <i>Agrostis perennans</i> (Walter) Tuck.                                          | 0.05.          | <i>Senecio chrysolepis</i> Phil.                                                  | 0.04           |
| <i>Bartsia flava</i> Molau                                                        | 0.04.          | <i>Ageratina glechonophylla</i> (Less.) R.M. King. H. Rob.                        | 0.03           |
| <i>Salpichroa glandulosa</i> (Hook.) Miers                                        | 0.04           | <i>Belonanthus hispidus</i> (Wedd.) Graebn.                                       | 0.03           |
| <i>Fuchsia apetala</i> Ruiz & Pav.                                                | 0.03           | <i>Halenia phyteumoides</i> Gilg (syn.= <i>Halenia weberbaueri</i> C.K. Allen)    | 0.02           |
| <i>Melpomene personata</i> Lehnert                                                | 0.02           | <i>Achyrocline ramosissima</i> Britton                                            | 0.02           |
| <i>Bartsia lydiae</i> S.P. Sylvester sp.nov.                                      | 0.02           | <i>Senecio genisianus</i> Cuatrec.                                                | 0.02           |
| <i>Senecio hastatifolius</i> Cabrera                                              | 0.02           | <i>Poa cf.trollii</i> (Pilg.) Refulio (syn. = <i>Dissanthelium trollii</i> Pilg.) | 0.01           |
| <i>Baccharis caespitosa</i> (Ruiz & Pav.) Pers.                                   | 0.02           | <i>Werneria plantaginifolia</i> Wedd. ex Klatt                                    | 0.01           |
| <i>Festuca</i> sp.1                                                               | 0.01           | <i>Gentianella thyrsoides</i> (Hook.) Fabris                                      | 0.01           |
| <i>Bartsia elongata</i> Wedd.                                                     | 0.01           | <i>Senecio flaccidifolius</i> Wedd.                                               | 0.01           |
| <i>Belloa schultzei</i> (Wedd.) Cabrera                                           | 0.01           | <i>Saxifraga magellanica</i> Poir.                                                | 0.01           |
| <i>Senecio adenophyllus</i> Meyen. Walp.                                          | 0.01           | <i>Caiophora contorta</i> (Desr.) C. Presl                                        | 0.01           |
| <i>Jamesonia imbricata</i> (Sw.) Hook. & Grev.                                    | 0.01           | <i>Senecio nutans</i> Sch.Bip.                                                    | 0.01           |

Species with significant ( $p < 0.05$ ) indval values are in bold. Undescribed species are highlighted in yellow and introduced species are highlighted in blue. Signif. codes: \*\*\*\*= $p < 0.001$ , \*\*\*= $p < 0.01$ , \*\*= $p < 0.05$ , \*= $p < 0.1$ . Species considered important components of each habitat type were given larger indval values and those seen to be more restricted to a certain habitat type were given higher significance values for that habitat type.

**Table S4 cont. Indicator species analysis<sup>79</sup> (indval) values of plants comparing inaccessible and accessible forest and grassland habitat.**

| Inaccessible forest indicator species                               | indval         | Inaccessible grassland indicator species                                            | indval         |
|---------------------------------------------------------------------|----------------|-------------------------------------------------------------------------------------|----------------|
| <i>Stellaria</i> sp.nov.                                            | 0.01           | <i>Werneria staticifolia</i> Sch.Bip.                                               | 0.01           |
| <i>Erigeron rosulatus</i> Wedd.                                     | 0.01           | <i>Calamagrostis</i> sp.nov. 2                                                      | 0.01           |
| <i>Berberis saxicola</i> Lechler                                    | 0.01           | <i>Miconia chionophila</i> Naudin                                                   | 0.01           |
| <i>Calamagrostis</i> cf. <i>polygama</i> (Griseb.) Parodi           | 0.01           | <i>Campyloneurum asplundii</i> (C. Chr.) Ching                                      | 0.01           |
| <i>Lasiocephalus lingulatus</i> Schldt.                             | 0.01           | <i>Moranopteris inaccessa</i> Sundue & S.P. Sylvester sp.nov.                       | 0.01           |
| <i>Loricaria thuyoides</i> (Lam.) Sch.Bip.                          | 0.01           | <i>Valeriana radicata</i> Graebn.                                                   | 0.01           |
| <i>Sisyrinchium palmifolium</i> L.                                  | 0.01           | <i>Chaptalia rotundifolia</i> D. Don                                                | 0.01           |
| <i>Silene andicola</i> Gillies ex Hook. & Arn.                      | 0              | <i>Olsynium junceum</i> (E. Mey. ex C. Presl) Goldblatt                             | 0.01           |
|                                                                     |                | <i>Festuca calcana</i> J.C. Ospina & S.P. Sylvester sp.nov. ined.                   | 0.01           |
| Accessible forest indicator species                                 | indval         | Accessible grassland indicator species                                              | indval         |
| <i>Poa horridula</i> Pilg.                                          | <b>0.42***</b> | <i>Lachemilla pinnata</i> (Ruiz & Pav.) Rothm.                                      | <b>0.50***</b> |
| <i>Polylepis racemosa</i> Ruiz & Pav.                               | <b>0.31***</b> | <i>Geranium sessiliflorum</i> Cav.                                                  | <b>0.47***</b> |
| <i>Oreomyrrhis andicola</i> (Kunth) Endl. ex Hook. f.               | <b>0.29***</b> | <i>Hypochoeris meyeniana</i> (Walp.) Benth. & Hook. f. ex Griseb.                   | <b>0.46***</b> |
| <i>Azorella multifida</i> (Ruiz & Pav.) Pers.                       | <b>0.26***</b> | <i>Calamagrostis vicunarum</i> (Wedd.) Pilg.                                        | <b>0.44***</b> |
| <i>Polylepis pepeii</i> B.B. Simpson                                | <b>0.24***</b> | <i>Luzula racemosa</i> Desv.                                                        | <b>0.44***</b> |
| <i>Gunnera magellanica</i> Lam.                                     | <b>0.23***</b> | <i>Gamochaeta americana</i> (Mill.) Wedd.                                           | <b>0.39***</b> |
| <i>Urtica magellanica</i> Juss. ex Poir.                            | <b>0.23***</b> | <i>Sisyrinchium brevipes</i> Baker                                                  | <b>0.37***</b> |
| <i>Poa annua</i> L.                                                 | <b>0.22***</b> | <i>Oxalis oreocharis</i> Diels                                                      | <b>0.37***</b> |
| <i>Gentianella rima</i> (D.Don ex G.Don) Fabris                     | <b>0.21***</b> | <i>Agrostis breviculmis</i> Hitchc.                                                 | <b>0.36***</b> |
| <i>Uncinia macrolepis</i> Decne.                                    | <b>0.21***</b> | <i>Calamagrostis heterophylla</i> (Wedd.) Pilg.                                     | <b>0.35***</b> |
| <i>Cotula mexicana</i> (DC.) Cabrera                                | <b>0.20***</b> | <i>Oenothera multicaulis</i> Ruiz & Pav.                                            | <b>0.33***</b> |
| <i>Ranunculus repens</i> L.                                         | <b>0.19***</b> | <i>Cardenanthus</i> sp.nov.                                                         | <b>0.33***</b> |
| <i>Werneria nubigena</i> Kunth                                      | <b>0.19***</b> | <i>Aciachne acicularis</i> Lægaard                                                  | <b>0.30***</b> |
| <i>Geranium core core</i> Steud.                                    | <b>0.18***</b> | <i>Lysipomia mitsyae</i> S.P. Sylvester & D. Quandt sp.nov.                         | <b>0.27***</b> |
| <i>Poa gymnantha</i> Pilg.                                          | <b>0.18***</b> | <i>Galium corymbosum</i> Ruiz & Pav.                                                | <b>0.27***</b> |
| <i>Stellaria media</i> (L.) Vill.                                   | <b>0.16***</b> | <i>Belloa piptolepis</i> (Wedd.) Cabrera                                            | <b>0.27***</b> |
| <i>Stellaria weddellii</i> Pedersen                                 | <b>0.16***</b> | <i>Carex ecuadorica</i> K.k.                                                        | <b>0.26***</b> |
| <i>Lachemilla andina</i> (L.M. Perry) Rothm.                        | <b>0.16***</b> | <i>Azorella biloba</i> (Schldt.) Wedd.                                              | <b>0.24***</b> |
| <i>Arenaria soratensis</i> Rohrb.                                   | <b>0.16***</b> | <i>Crassula closiana</i> (Gay) Reiche                                               | <b>0.23***</b> |
| <i>Baccharis alpina</i> Kunth                                       | <b>0.15***</b> | <i>Peperomia verruculosa</i> Dahlst. ex A.W. Hill                                   | <b>0.22***</b> |
| <i>Veronica arvensis</i> L.                                         | <b>0.15***</b> | <i>Novenia acaulis</i> (Benth. & Hook. f. ex B.D. Jacks.) S.E. Freire & F.H. Hellw. | <b>0.22***</b> |
| <i>Sisyrinchium jamesonii</i> Baker                                 | <b>0.13***</b> | <i>Muhlenbergia peruviana</i> (P. Beauv.) Steud.                                    | <b>0.21***</b> |
| <i>Halenia umbellata</i> (Ruiz & Pav.) Gilg                         | <b>0.13***</b> | <i>Cerastium crassipes</i> Bartl.                                                   | <b>0.17***</b> |
| <i>Stellaria cuspidata</i> Willd. ex Schldt.                        | <b>0.12***</b> | <i>Lupinus microphyllus</i> Desr.                                                   | <b>0.17***</b> |
| <i>Bromus lanatus</i> Kunth                                         | <b>0.11***</b> | <i>Paspalum pygmaeum</i> Hack.                                                      | <b>0.17***</b> |
| <i>Senecio peruensis</i> Cuatrec.                                   | <b>0.11***</b> | <i>Gentianella peruviana</i> (Griseb.) Fabris                                       | <b>0.16***</b> |
| <i>Lysipomia laciniata</i> A. DC.                                   | <b>0.11***</b> | <i>Gentianella</i> sp.1                                                             | <b>0.16***</b> |
| <i>Gentianella viridiflora</i> S. Pfanzelt & S.P. Sylvester sp.nov. | <b>0.08***</b> | <i>Festuca casapaltensis</i> J.Ball                                                 | <b>0.15***</b> |

Species with significant ( $p < 0.05$ ) indval values are in bold. Undescribed species are highlighted in yellow and introduced species are highlighted in blue. Signif. codes: \*\*\*\*= $p < 0.001$ , \*\*\*= $p < 0.01$ , \*\*= $p < 0.05$ , \*= $p < 0.1$ . Species considered important components of each habitat type were given larger indval values and those seen to be more restricted to a certain habitat type were given higher significance values for that habitat type.

Table S4 cont. Indicator species analysis<sup>79</sup> (indval) values of plants comparing inaccessible and accessible forest and grassland habitat.

| Accessible forest indicator species                     | indval  | Accessible grassland indicator species                     | indval  |
|---------------------------------------------------------|---------|------------------------------------------------------------|---------|
| <i>Festuca tenuiculmis</i> Tovar                        | 0.06*** | <i>Muehlenbeckia volcanica</i> (Benth.) Endl.              | 0.15*** |
| <i>Solanum tuberosum</i> L.                             | 0.06*** | <i>Myrosmodes paludosum</i> (Rchb. f.) P. Ortiz            | 0.14*** |
| <i>Poa subspicata</i> (J. Presl) Kunth                  | 0.13*   | <i>Cyperus seslerioides</i> Kunth                          | 0.14*** |
| <i>Calamagrostis deserticola</i> (Phil.) Phil.          | 0.09*   | <i>Calamagrostis rigescens</i> (J. Presl) Scribn.          | 0.13*** |
| <i>Plantago australis</i> Lam.                          | 0.07*   | <i>Arenaria digyna</i> Willd. ex Schltld.                  | 0.12*** |
| <i>Belloa longifolia</i> (Cuatrec.) Sagast. & Dillon    | 0.07*   | <i>Poa serpaiana</i> Refulio                               | 0.11*** |
| <i>Agrostis tolucensis</i> Kunth                        | 0.07*   | <i>Ophioglossum crotalophoroides</i> Walter                | 0.10*** |
| <i>Perezia ciliosa</i> (Phil.) Reiche                   | 0.06*   | <i>Plantago lamprophylla</i> Pilg.                         | 0.10*** |
| <i>Carex bonplandii</i> Kunth                           | 0.06*   | <i>Lachemilla aphanoides</i> (Mutis ex L. f.) Rothm.       | 0.09*** |
| <i>Erigeron cf. chionophilus</i> Wedd.                  | 0.06*   | <i>Oxalis nubigena</i> Walp.                               | 0.08*** |
| <i>Astragalus uniflorus</i> DC.                         | 0.06*   | <i>Lupinus herzogii</i> Ulbr.                              | 0.08*** |
| <i>Werneria pectinata</i> Lingelsh.                     | 0.05*   | <i>Aphanactis villosa</i> S. F. Blake                      | 0.08*** |
| <i>Polystichum nudicaule</i> Rosenst.                   | 0.05*   | <i>Poa macusaniensis</i> (E.H.L. Krause) Refulio           | 0.08*** |
| <i>Cystopteris fragilis</i> (L.) Bernh.                 | 0.05*   | <i>Geranium sibbaldioides</i> Benth.                       | 0.08*** |
| <i>Bromus modestus</i> Renvoize                         | 0.05*   | <i>Lachemilla fulvescens</i> (L.M. Perry) Rothm.           | 0.07*** |
| <i>Senecio modestus</i> Wedd.                           | 0.05*   | <i>Wahlenbergia peruviana</i> A.Gray                       | 0.07*** |
| <i>Halenia caespitosa</i> Gilg                          | 0.05*   | <i>Gentiana sedifolia</i> Kunth                            | 0.07*** |
| <b><i>Cerastium glomeratum</i> Thuill.</b>              | 0.05*   | <i>Gnaphalium melanosphaeroides</i> Sch. Bip. ex Wedd.     | 0.07*** |
| <i>Festuca soukupii</i> Stancik                         | 0.04*   | <i>Trifolium amabile</i> Kunth                             | 0.07*** |
| <i>Plagiobothrys humilis</i> (Ruiz & Pav.) I.M. Johnst. | 0.04*   | <i>Solanum acaule</i> Bitter                               | 0.07*** |
| <i>Cardamine bonariensis</i> Pers.                      | 0.04*   | <i>Acaena cylindristachya</i> Ruiz & Pav.                  | 0.05*** |
| <i>Valeriana pycnantha</i> A. Gray                      | 0.04*   | <i>Oreobolopsis tepalifera</i> T. Koyama & Guagl.          | 0.18**  |
| <i>Werneria caespitosa</i> Wedd.                        | 0.04*   | <i>Perezia pinnatifida</i> (Bonpl.) Wedd.                  | 0.10*   |
| <b><i>Werneria sp.nov.</i></b>                          | 0.04*   | <i>Werneria pygmaea</i> Gillies ex Hook. & Arn.            | 0.08*   |
| <i>Lachemilla orbiculata</i> (Ruiz & Pav.) Rydb.        | 0.04*   | <i>Gentianella cf. persquarrosa</i> (Reimers) J.S. Pringle | 0.08*   |
| <b><i>Capsella bursa pastoris</i> (L.) Medik.</b>       | 0.03*   | <i>Poa perligulata</i> Pilg.                               | 0.07*   |
| <i>Hydrocotyle filipes</i> Mathias                      | 0.03*   | <i>Festuca cf. rigescens</i> (J. Presl) Kunth              | 0.07*   |
| <i>Asplenium castaneum</i> Schltld. & Cham.             | 0.03*   | <i>Bartsia peruviana</i> Walp.                             | 0.07*   |
| <b><i>Bromus catharticus</i> Vahl</b>                   | 0.03*   | <i>Calandrinia acaulis</i> Kunth                           | 0.07*   |
| <i>Oritrophium hieracioides</i> (Wedd.) Cuatrec.        | 0.06.   | <i>Tarasa urbaniana</i> (Ulbr.) Krapov.                    | 0.06*   |
| <i>Lachemilla tanacetifolia</i> Rothm.                  | 0.04.   | <i>Hordeum muticum</i> J. Presl                            | 0.06*   |
| <i>Montia fontana</i> L.                                | 0.03.   | <i>Hypochaeris taraxacoides</i> Ball                       | 0.06*   |
| <i>Plantago rigida</i> Kunth                            | 0.03.   | <i>Aphanes parvula</i> Gutte                               | 0.06*   |
| <i>Poa swallenii</i> Refulio                            | 0.03.   | <i>Muhlenbergia ligularis</i> (Hack.) Hitchc.              | 0.06*   |
| <i>Draba cuzcoensis</i> O.E.Schulz                      | 0.03.   | <i>Lupinus pulvinaris</i> Ulbr.                            | 0.06*   |
| <b><i>Veronica opaca</i> Fr.</b>                        | 0.02.   | <i>Belloa kunthiana</i> (DC.) Anderb. & S.E. Freire        | 0.06*   |
| <i>Nototriche longirostris</i> (Wedd.) A.W. Hill        | 0.02.   | <i>Berberis lutea</i> Ruiz & Pav.                          | 0.05*   |
| <i>Castilleja virgatoidea</i> Edwin                     | 0.04    | <i>Castilleja pumila</i> (Benth.) Wedd.                    | 0.05*   |

Species with significant ( $p < 0.05$ ) indval values are in bold. Undescribed species are highlighted in yellow and introduced species are highlighted in blue. Signif. codes: \*\*\*\*= $p < 0.001$ , \*\*\*= $p < 0.01$ , \*\*= $p < 0.05$ , \*= $p < 0.1$ . Species considered important components of each habitat type were given larger indval values and those seen to be more restricted to a certain habitat type were given higher significance values for that habitat type.

**Table S4 cont. Indicator species analysis<sup>79</sup> (indval) values of plants comparing inaccessible and accessible forest and grassland habitat.**

| Accessible forest indicator species                                 | indval | Accessible grassland indicator species                                          | indval       |
|---------------------------------------------------------------------|--------|---------------------------------------------------------------------------------|--------------|
| <i>Baccharis papillosa</i> Rusby                                    | 0.03   | <b><i>Senecio candollei</i> Wedd.</b>                                           | <b>0.05*</b> |
| <i>Festuca dolichophylla</i> J.Presl                                | 0.03   | <b><i>Nassella mexicana</i> (Hitchc.) R.W. Pohl</b>                             | <b>0.05*</b> |
| <i>Nassella inconspicua</i> (J. Presl) Barkworth                    | 0.02   | <b><i>Perezia multiflora</i> (Bonpl.) Less.</b>                                 | <b>0.04*</b> |
| <i>Noticastrum marginatum</i> (H.B.K.) Cuatr.                       | 0.02   | <b><i>Facelis plumosa</i> (Wedd.) Sch.Bip.</b>                                  | <b>0.04*</b> |
| <i>Werneria aretioides</i> Wedd.                                    | 0.02   | <b><i>Paronychia muschleri</i> Chaudhri</b>                                     | <b>0.04*</b> |
| <i>Vulpia myuros</i> (L.) C.C. Gmel.                                | 0.02   | <b><i>Bartsia pauciflora</i> Molau</b>                                          | <b>0.03*</b> |
| <i>Calceolaria engleriana</i> Kraenzl.                              | 0.02   | <b><i>Carex boliviensis</i> Van Heurck &amp; M.II. Arg.</b>                     | <b>0.03*</b> |
| <i>Polypodium chrysolepis</i> Hook.                                 | 0.02   | <b><i>Calamagrostis amoena</i> var. <i>festucoides</i> (Wedd.) Soreng</b>       | <b>0.03*</b> |
| <i>Brayopsis alpaminae</i> Gilg & Muschl. subsp. <i>alpaminae</i>   | 0.02   | <b><i>Bidens andicola</i> Kunth</b>                                             | <b>0.03*</b> |
| <i>Thelypteris</i>                                                  | 0.02   | <b><i>Calceolaria scapiflora</i> (Ruiz &amp; Pav.) Benth.</b>                   | <b>0.03*</b> |
| <i>Trisetum spicatum</i> (L.) K. Richt.                             | 0.02   | <b><i>Hypericum brevistylum</i> Choisy</b>                                      | <b>0.03*</b> |
| <i>Epilobium denticulatum</i> Ruiz & Pav.                           | 0.02   | <b><i>Luciliocline subspicata</i> (Wedd.) Anderb. &amp; S.E.Freire</b>          | <b>0.03*</b> |
| <i>Mimulus glabratus</i> Kunth                                      | 0.02   | <b><i>Urtica flabellata</i> Kunth</b>                                           | <b>0.03*</b> |
| <i>Valeriana mandonii</i> Britton                                   | 0.02   | <b><i>Poa calycina</i> (J. Presl) Kunth</b>                                     | <b>0.03*</b> |
| <i>Poa infirma</i> Kunth                                            | 0.02   | <b><i>Trichoporum rigidum</i> (Boeckeler) Goetgh. Muasya &amp; D.A. Simpson</b> | <b>0.03*</b> |
| <i>Cerastium mollissimum</i> Poir.                                  | 0.01   | <b><i>Crassula connata</i> (Ruiz &amp; Pav.) A.Berger</b>                       | <b>0.03*</b> |
| <i>Draba werffii</i> Al Shehbaz                                     | 0.01   | <i>Gnaphalium badium</i> Wedd.                                                  | 0.04.        |
| <i>Bowlesia flabilis</i> J.F. Macbr.                                | 0.01   | <i>Lepidium abrotanifolium</i> Turcz.                                           | 0.03.        |
| <i>Senecio canescens</i> (Humb. & Bonpl.) Cuatrec.                  | 0.01   | <i>Lupinus soratensis</i> Rusby                                                 | 0.02.        |
| <i>Plantago tubulosa</i> Decne.                                     | 0.01   | <i>Hedeoma mandoniana</i> Wedd.                                                 | 0.02.        |
| <i>Polystichum orbiculatum</i> (Desv.) J. Rémy & Fée                | 0.01   | <i>Gamochoaeta purpurea</i> (L.) Cabrera                                        | 0.02.        |
| <i>Oritrophium</i> sp.                                              | 0.01   | <i>Festuca peruviana</i> Infantes                                               | 0.02.        |
| <i>Aciachne pulvinata</i> Benth.                                    | 0.01   | <i>Festuca asplundii</i> E.B. Alexeev                                           | 0.02.        |
| <i>Urtica urens</i> L.                                              | 0.01   | <i>Distichia muscoides</i> Nees. Meyen.                                         | 0.02.        |
| <i>Hypochaeris sessiliflora</i> Kunth                               | 0.01   | <i>Castilleja nubigena</i> Kunth                                                | 0.02.        |
| <i>Calamagrostis ovata</i> (J. Presl) Steud.                        | 0.01   | <i>Carex jamesonii</i> Boott                                                    | 0.02.        |
| <i>Ribes bolivianum</i> Jancz.                                      | 0.01   | <i>Alstroemeria pygmaea</i> Herb.                                               | 0.02.        |
| <i>Clinopodium brevicalyx</i> (Epling) Harley & A.Granda            | 0.01   | <i>Agrostis trichodes</i> (Kunth) Roem. & Schult.                               | 0.02.        |
| <i>Oxalis conorrhiza</i> Jacq.                                      | 0.01   | <i>Acaena elongata</i> L.                                                       | 0.02.        |
| <i>Colobanthus quitensis</i> (Kunth) Bartl.                         | 0.01   | <i>Paranephelius ovatus</i> A.Gray ex Wedd.                                     | 0.02         |
| <i>Senecio</i> sp.1                                                 | 0.01   | <i>Lupinus chlorolepis</i> C.P. Sm.                                             | 0.02         |
| <i>Phyllactis pulvinata</i> Rauh. Willer                            | 0.01   | <i>Oritrophium limnophilum</i> (Sch.Bip.) Cuatrec.                              | 0.02         |
| <i>Asplenium haenkeanum</i> (C. Presl) Hieron.                      | 0.01   | <i>Bartsia pyricarpa</i> Molau                                                  | 0.02         |
| <i>Asplenium peruvianum</i> Desv.                                   | 0.01   | <i>Arcytophyllum filiforme</i> (Ruiz & Pav.) Standl.                            | 0.02         |
| <i>Festuca humilior</i> Nees. Meyen                                 | 0.01   | <i>Rumex acetosella</i> L.                                                      | 0.01         |
| <i>Elaphoglossum mathewsii</i> (Fée) T. Moore                       | 0.01   | <i>Veronica serpyllifolia</i> L.                                                | 0.01         |
| <i>Melpomene moniliformis</i> (Lagasca ex. Sw.) A.R.Sm. & R.C.Moran | 0.01   | <i>Bartsia stricta</i> (Kunth) Benth.                                           | 0.01         |
| <i>Elaphoglossum hartwegii</i> (Fée) T. Moore                       | 0.01   | <i>Microsteris gracilis</i> (Douglas ex Hook.) Greene                           | 0.01         |

Species with significant ( $p < 0.05$ ) indval values are in bold. Undescribed species are highlighted in yellow and introduced species are highlighted in blue. Signif. codes: \*\*\*\*= $p < 0.001$ , \*\*\*= $p < 0.01$ , \*\*= $p < 0.05$ , \*= $p < 0.1$ . Species considered important components of each habitat type were given larger indval values and those seen to be more restricted to a certain habitat type were given higher significance values for that habitat type.

**Table S4 cont. Indicator species analysis<sup>79</sup> (indval) values of plants comparing inaccessible and accessible forest and grassland habitat.**

| Accessible forest indicator species                                                                 | indval | Accessible grassland indicator species                           | indval |
|-----------------------------------------------------------------------------------------------------|--------|------------------------------------------------------------------|--------|
| <i>Cardamine vulgaris</i> Phil.                                                                     | 0.01   | <i>Eleocharis albibracteata</i> Nees & Meyen ex Kunth            | 0.01   |
| <i>Descurainia myriophylla</i> (Willd. ex DC.) R.E. Fr. (Synonym=<br><i>D.mabridei</i> O.E. Schulz) | 0.01   | <i>Woodsia montevidensis</i> (Spreng.) Hieron.                   | 0.01   |
| <i>Calamagrostis orbignyana</i> (Wedd.) Wedd. ex Pilg.                                              | 0      | <i>Gamochoeta longipedicellata</i> Cabrera                       | 0.01   |
| <i>Uncinia phleoides</i> (Cav.) Pers.                                                               | 0      | <i>Viola pygmaea</i> Juss. ex Poir                               | 0.01   |
|                                                                                                     |        | <i>Phlegmariurus crassus</i> (Humb. & Bonpl. ex Willd.) B. Øllg. | 0.01   |
|                                                                                                     |        | <i>Lachemilla vulcanica</i> (Schltdl. & Cham.) Rydb.             | 0.01   |
|                                                                                                     |        | <i>Taraxacum officinale</i> F.H. Wigg.                           | 0.01   |
|                                                                                                     |        | <i>Asteraceae</i> sp.3                                           | 0.01   |
|                                                                                                     |        | <i>Plagiobothrys congestus</i> (Wedd.) I.M. Johnst.              | 0.01   |
|                                                                                                     |        | <i>Potentilla dombeyi</i> Nestl.                                 | 0.01   |
|                                                                                                     |        | <i>Asplenium stoloniferum</i> Bory                               | 0.01   |
|                                                                                                     |        | <i>Calamagrostis spicigera</i> (J. Presl) Steud.                 | 0.01   |
|                                                                                                     |        | <i>Festuca inarticulata</i> Ollg.                                | 0.01   |
|                                                                                                     |        | <i>Calamagrostis</i> sp.3                                        | 0.01   |
|                                                                                                     |        | <i>Cicendia quadrangularis</i> (Dombey ex Lam.) Griseb.          | 0.01   |
|                                                                                                     |        | <i>Soliva sessilis</i> Ruiz & Pav.                               | 0.01   |
|                                                                                                     |        | <i>Calamagrostis fiebrigii</i> Pilg.                             | 0.01   |
|                                                                                                     |        | <i>Peperomia</i> sp.2                                            | 0.01   |
|                                                                                                     |        | <i>Peperomia</i> sp.1                                            | 0.01   |
|                                                                                                     |        | <i>Descurainia athrocarpa</i> (A. Gray) O.E. Schulz              | 0.01   |
|                                                                                                     |        | <i>Lysipomia sphagnophila</i> Griseb. ex Wedd.                   | 0.01   |
|                                                                                                     |        | <i>Senecio evacoides</i> Sch.Bip. ex Wedd.                       | 0.01   |
|                                                                                                     |        | <i>Calamagrostis sclerantha</i> Hack.                            | 0.01   |
|                                                                                                     |        | <i>Cotula australis</i> (Sieber ex Spreng.) Hook. f.             | 0.01   |
|                                                                                                     |        | <i>Agrostis meyenii</i> Trin.                                    | 0.01   |
|                                                                                                     |        | <i>Lupinus ballianus</i> C.P. Sm.                                | 0.01   |
|                                                                                                     |        | <i>Ribes cuneifolium</i> Ruiz & Pav.                             | 0.01   |
|                                                                                                     |        | <i>Brayopsis calycina</i> (Desv.) Gilg & Muschl.                 | 0      |
|                                                                                                     |        | <i>Ephedra rupestris</i> Benth.                                  | 0      |

Species with significant ( $p < 0.05$ ) indval values are in bold. Undescribed species are highlighted in yellow and introduced species are highlighted in blue. Signif. codes: \*\*\*\*= $p < 0.001$ , \*\*\*= $p < 0.01$ , \*\*= $p < 0.05$ , '== $p < 0.1$ . Species considered important components of each habitat type were given larger indval values and those seen to be more restricted to a certain habitat type were given higher significance values for that habitat type.

**Table S5. Indicator species analysis<sup>79</sup> (indval) values of epiphytic lichen species comparing deadwood and live tree habitat.**

| Deadwood indicator species                                                                                           | indval         | Live tree indicator species                                           | indval |
|----------------------------------------------------------------------------------------------------------------------|----------------|-----------------------------------------------------------------------|--------|
| <b><i>Parmelinopsis subfaticens</i> (Kurok.) Elix &amp; Hale</b>                                                     | <b>0.29***</b> | <i>Cetrariastrum</i> sp.                                              | 0.03.  |
| <b><i>Normandina pulchella</i> (Borrer) Nyl.</b>                                                                     | <b>0.26***</b> | <i>Hypotrachyna bogotensis</i> (Vain.) Hale                           | 0.02.  |
| <b><i>Ramalina reducta</i> Krog &amp; Swinscow</b>                                                                   | <b>0.23***</b> | <i>Usnea</i> sp.1                                                     | 0.06   |
| <b><i>Heterodermia parva</i> Morbeg</b>                                                                              | <b>0.22***</b> | <i>Cladonia borbonica</i> Nyl.                                        | 0.04   |
| <b><i>Usnea fulvoreaegens</i> (Räsänen) Räsänen</b>                                                                  | <b>0.2***</b>  | <i>Chaenotheca brunneola</i> (Ach.) Müll. Arg.                        | 0.04   |
| <b><i>Caloplaca</i> sp.1</b>                                                                                         | <b>0.2***</b>  | <i>Chaenotheca furfuracea</i> (L.) Tibell                             | 0.04   |
| <b><i>Leptogium resupinans</i> Nyl.</b>                                                                              | <b>0.2***</b>  | <i>Buellia rhizocarpica</i> Etayo, Giralt & Elix.                     | 0.03   |
| <b><i>Rinodina</i> sp.</b>                                                                                           | <b>0.18***</b> | <i>Parmeliella incrassata</i> P.M. Jørg.                              | 0.03   |
| <b><i>Bacidia</i> sp.</b>                                                                                            | <b>0.14***</b> | <i>Chaenotheca</i> aff. <i>chrysocephala</i> (Turner ex Ach.) Th. Fr. | 0.02   |
| <b><i>Heterodermia magellanica</i> (Zahlbr.) Winsc. &amp; Krog</b>                                                   | <b>0.09***</b> | <i>Cladonia pocillum</i> (Ach.) O.J. Rich.                            | 0.02   |
| <b><i>Chaenotheca chrysocephala</i> (Turner ex Ach.) Th. Fr.</b>                                                     | <b>0.21**</b>  | <i>Sticta laevis</i> (Nyl.) Vain.                                     | 0.02   |
| <b><i>Buellia</i> sp.1</b>                                                                                           | <b>0.17**</b>  | <i>Sticta albocypbellata</i> Moncada & Lücking ined.                  | 0.02   |
| <b><i>Oropogon bicolor</i> Essl.</b>                                                                                 | <b>0.14**</b>  | <i>Cladonia chlorophaea</i> (Flörke ex Sommerf.) Spreng.              | 0.02   |
| <b><i>Cetrariastrum dubitans</i> Sipman</b>                                                                          | <b>0.12**</b>  | <i>Sticta paralimbata</i> Moncada & Lücking ined.                     | 0.02   |
| <b><i>Pannaria rubiginosa</i> (Thunb. ex Ach.) Delise</b>                                                            | <b>0.09**</b>  | <i>Botryolepraria neotropica</i> Kukwa & Pérez-Ortega                 | 0.02   |
| <b><i>Amandinea</i> sp.1</b>                                                                                         | <b>0.08**</b>  | <i>Cladonia subradiata</i> (Vain.) Sandst.                            | 0.01   |
| <b>Sp.1</b>                                                                                                          | <b>0.07**</b>  | <i>Sticta dioica</i> Moncada & Lücking ined.                          | 0.01   |
| <b><i>Cetrariastrum equadoriense</i> (R.Sant.) Sipman</b>                                                            | <b>0.13*</b>   | <i>Chaenotheca</i> cf. <i>chlorella</i> (Ach.) Müll. Arg.             | 0.01   |
| <b><i>Lecidea</i> sp.1</b>                                                                                           | <b>0.1*</b>    | <i>Coenogonium</i> aff. <i>luteolum</i> (Kalb) Kalb & Lücking         | 0.01   |
| <b><i>Leptogium andinum</i> P.M. Jørg.</b>                                                                           | <b>0.09*</b>   | <i>Dictyonema glabratum</i> (Spreng.) D. Hawksw.                      | 0.01   |
| <b><i>Oropogon loxensis</i> (Fée) Zupal</b>                                                                          | <b>0.09*</b>   | <i>Gyalideopsis</i> sp.                                               | 0.01   |
| <b><i>Melanohalea subolivacea</i> (Nyl. ex Hasse) O. Blanco, A. Crespo, Divakar, Essl., D. Hawksw. &amp; Lumbsch</b> | <b>0.08*</b>   | <i>Hypogymnia</i> sp.                                                 | 0.01   |
| <b><i>Buellia</i> sp.2</b>                                                                                           | <b>0.08*</b>   | <i>Hypotrachyna longiloba</i> (H. Magn.) C.W.Sm.                      | 0.01   |
| <b><i>Oropogon</i> sp.1</b>                                                                                          | <b>0.07*</b>   | <i>Pertusaria subambigens</i> Dibben                                  | 0.01   |
| <b><i>Collema glaucophthalmum</i> Nyl.</b>                                                                           | <b>0.06*</b>   | <i>Phyllopsora</i> sp.                                                | 0.01   |
| <b><i>Scoliciosporum</i> sp.</b>                                                                                     | <b>0.05*</b>   | Sp.7                                                                  | 0.01   |
| <b><i>Buellia</i> sp.4</b>                                                                                           | <b>0.04*</b>   | <i>Hypotrachyna</i> sp.                                               | 0.01   |
| <b><i>Ochrolechia africana</i> Vain.</b>                                                                             | <b>0.03*</b>   | <i>Peltigera fibrilloides</i> (Gyeln.) Vitik.                         | 0.01   |
| <i>Arthonia</i> sp.1                                                                                                 | 0.09.          | <i>Hypotrachyna meyeri</i> (Zahlbr.) Streimann                        | 0.01   |
| <i>Leptogium punctulatum</i> Nyl.                                                                                    | 0.06.          | <i>Chrysothrix</i> sp.                                                | 0.01   |
| <i>Opegrapha</i> sp.                                                                                                 | 0.05.          | <i>Parmelina cleefii</i> Sipman                                       | 0.01   |
| <i>Biatora</i> sp.                                                                                                   | 0.04.          | <i>Sticta tomentosa</i> (Sw.) Ach.                                    | 0.01   |
| <i>Agonimia tristicula</i> (Nyl.) Zahlbr.                                                                            | 0.03.          | <i>Sticta atroandensis</i> Moncada & Lücking                          | 0.01   |
| <i>Cetrariastrum andense</i> (Kärnefelt) Sipman                                                                      | 0.09           | <i>Dimarella pineti</i> (Ach.) Vězda                                  | 0.01   |
| <i>Usnea wasmuthii</i> Räsänen                                                                                       | 0.08           | <i>Sticta brevior</i> Moncada & Lücking                               | 0.01   |
| <i>Leptogium cochleatum</i> (Dicks.) P.M. Jørg. & P. James                                                           | 0.08           | <i>Sticta marilandia</i> Moncada & Lücking ined.                      | 0.00   |
| <i>Sticta</i> sp.5                                                                                                   | 0.08           | <i>Hypotrachyna sinuosa</i> (Sm.) Hale                                | 0.00   |
| <i>Sticta</i> sp.1                                                                                                   | 0.06           | Sp.6                                                                  | 0.00   |

Species with significant ( $p < 0.05$ ) indval values are highlighted in grey and bold. Signif. codes: '\*\*\*'= $p < 0.001$ , '\*\*'= $p < 0.01$ , '\*'= $p < 0.05$ , '.'= $p < 0.1$ . Species considered important components of each habitat type were given larger indval values and those seen to be more restricted to a certain habitat type were given higher significance values for that habitat type.



**Table S5 cont. Indicator species analysis<sup>79</sup> (indval) values of epiphytic lichen species comparing deadwood and live tree habitat.**

| Deadwood indicator species                              | indval      | Live tree indicator species             | indval      |
|---------------------------------------------------------|-------------|-----------------------------------------|-------------|
| <i>Lecanora</i> sp.                                     | <b>0.06</b> | <i>Sticta</i> sp.3                      | <b>0.00</b> |
| <i>Usnea cornuta</i> Körb.                              | 0.05        | <i>Cladonia merochlorophaea</i> Asahina | 0.00        |
| <i>Psoroma hypnorum</i> (Vahl) Gray                     | 0.04        | <i>Sticta sylvatica</i> (Huds.) Ach.    | 0.00        |
| <i>Leptogium mandonii</i> P.M. Jørg.                    | 0.04        |                                         |             |
| <i>Sticta</i> sp.2                                      | 0.03        |                                         |             |
| <i>Sticta andensis</i> (Nyl.) Trevis.                   | 0.03        |                                         |             |
| <i>Usnea fragilesceus</i> Hav. ex Lynge                 | 0.03        |                                         |             |
| <i>Milospium</i> sp.                                    | 0.02        |                                         |             |
| <i>Usnea esperantiana</i> P. Clerc                      | 0.02        |                                         |             |
| <i>Leptogium laceroides</i> B. de Lesd.                 | 0.02        |                                         |             |
| <i>Remototrachyna</i> sp.                               | 0.02        |                                         |             |
| <i>Leptogium phyllocarpum</i> (Pers.) Mont.             | 0.02        |                                         |             |
| <i>Leptogium menziesii</i> (Sm.) Mont.                  | 0.02        |                                         |             |
| <i>Pertusaria</i> sp.                                   | 0.02        |                                         |             |
| <i>Caloplaca</i> sp.2                                   | 0.02        |                                         |             |
| <i>Chaenotheca chlorella</i> (Ach.) Müll.Arg.           | 0.02        |                                         |             |
| <i>Dimerella lutea</i> (Dicks.) Trevis.                 | 0.02        |                                         |             |
| <i>Collema fasciculare</i> (L.) Weber ex F.H. Wigg.     | 0.02        |                                         |             |
| <i>Bacidina</i> sp.                                     | 0.02        |                                         |             |
| <i>Stereocaulon glareosum</i> (Savicz) H. Magn.         | 0.02        |                                         |             |
| <i>Leprocaulon congestum</i> (Nyl.) I.M. Lamb & A. Ward | 0.01        |                                         |             |
| Sp.5                                                    | 0.01        |                                         |             |
| <i>Candelariella</i> sp.1                               | 0.01        |                                         |             |
| <i>Sticta sublimbatoides</i> Moncada & Lücking ined.    | 0.01        |                                         |             |
| <i>Psorogalaena</i> sp.                                 | 0.01        |                                         |             |
| <i>Chaenothecopsis nivea</i> (F. Wilson) Tibell         | 0.01        |                                         |             |
| <i>Buellia proximata</i> H. Magn.                       | 0.01        |                                         |             |
| <i>Lecidea</i> sp.2                                     | 0.01        |                                         |             |
| <i>Megalospora admixta</i> (Nyl.) Sipman                | 0.01        |                                         |             |
| <i>Megaspora verrucosa</i> (Ach.) Hafellner & V. Wirth  | 0.01        |                                         |             |
| <i>Sticta fuliginosa</i> (Dicks.) Ach.                  | 0.01        |                                         |             |
| <i>Sticta maculofuliginosa</i> Moncada & Lücking        | 0.01        |                                         |             |
| <i>Sticta paramuna</i> Moncada & Lücking ined.          | 0.01        |                                         |             |
| Sp.3                                                    | 0.01        |                                         |             |
| <i>Arthonia</i> sp.2                                    | 0.01        |                                         |             |
| <i>Hypotrachyna ensifolia</i> (Kurok.) Hale             | 0.01        |                                         |             |
| <i>Hypotrachyna sublaevigata</i> (Nyl.) Hale            | 0.01        |                                         |             |
| Sp.4                                                    | 0.01        |                                         |             |
| <i>Porina</i> sp.                                       | 0.01        |                                         |             |

Species with significant ( $p < 0.05$ ) indval values are highlighted in grey and bold. Signif. codes: '\*\*\*\*'= $p < 0.001$ , '\*\*\*'= $p < 0.01$ , '\*\*'= $p < 0.05$ , '\*'= $p < 0.1$ . Species considered important components of each habitat type were given larger indval values and those seen to be more restricted to a certain habitat type were given higher significance values for that habitat type.

**Table S5 cont. Indicator species analysis<sup>79</sup> (indval) values of epiphytic lichen species comparing deadwood and live tree habitat.**

| <b>Deadwood indicator species</b>                    | <b>indval</b> | <b>Live tree indicator species</b> | <b>indval</b> |
|------------------------------------------------------|---------------|------------------------------------|---------------|
| <i>Chaenothecopsis pusilla</i> (Ach.) A.F.W. Schmidt | 0.01          |                                    |               |
| <i>Leptogium burgessii</i> (L.) Mont.                | 0.01          |                                    |               |
| <i>Cladonia cartilaginea</i> Müll. Arg.              | 0.00          |                                    |               |
| <i>Chaenothecopsis debilis</i> (Sm.) Tibell          | 0.00          |                                    |               |
| <i>Buellia disciformis</i> (Fr.) Mudd                | 0.00          |                                    |               |
| <i>Candelariella</i> sp.2                            | 0.00          |                                    |               |
| <i>Chysothrix</i> sp.                                | 0.00          |                                    |               |
| <i>Cladonia</i> sp.                                  | 0.00          |                                    |               |
| <i>Leptogium coralloideum</i> (Meyen & Flot.) Vain.  | 0.00          |                                    |               |
| <i>Leptogium cyanescens</i> (Pers.) Körb.            | 0.00          |                                    |               |
| <i>Pannaria andina</i> P.M. Jørg. & Sipman           | 0.00          |                                    |               |
| Sp.8                                                 | 0.00          |                                    |               |
| <i>Sticta rhizinata</i> Moncada & Lücking            | 0.00          |                                    |               |
| <i>Usnea glabrata</i> (Ach.) Vain.                   | 0.00          |                                    |               |
| <i>Usnea setulosa</i> Motyka                         | 0.00          |                                    |               |
| <i>Usnea</i> sp.2                                    | 0.00          |                                    |               |

Species with significant ( $p < 0.05$ ) indval values are highlighted in grey and bold. Signif. codes: \*\*\*\*= $p < 0.001$ , \*\*\*= $p < 0.01$ , \*\*= $p < 0.05$ , .= $p < 0.1$ . Species considered important components of each habitat type were given larger indval values and those seen to be more restricted to a certain habitat type were given higher significance values for that habitat type.

**Table S6. Morphological traits, their corresponding scaled principal component loadings, eigenvalues and proportion of the data explained.**

| Trait                        | PC1 'low-growing herbs' | PC2 'tussock grasses' | PC3 'trees' | PC4 'geophytes' | PC5 'large creeping forbs' | PC6 'not large biennial herbs' | PC7 'short graminoid -s' | PC8 'not spiny or cushion forming' |
|------------------------------|-------------------------|-----------------------|-------------|-----------------|----------------------------|--------------------------------|--------------------------|------------------------------------|
| Moderately hairy             | <b>1.04</b>             | -0.45                 | 0.06        | -0.24           | 0.57                       | -0.12                          | 0.23                     | -0.01                              |
| Densely hairy                | 0.10                    | -0.08                 | -0.08       | 0.13            | -0.16                      | -0.20                          | -0.24                    | 0.32                               |
| Spiny or stinging            | 0.12                    | -0.03                 | -0.04       | -0.11           | -0.25                      | -0.21                          | <b>-1.00</b>             | <b>-1.13</b>                       |
| Sclerophyllous               | 0.35                    | <b>1.04</b>           | 0.26        | <b>-0.80</b>    | 0.21                       | -0.28                          | -0.07                    | -0.35                              |
| Tussocks                     | 0.09                    | <b>1.30</b>           | 0.28        | -0.67           | 0.45                       | -0.11                          | -0.14                    | 0.06                               |
| Graminoid                    | 0.41                    | <b>1.19</b>           | 0.17        | -0.31           | -0.60                      | -0.54                          | <b>0.70</b>              | -0.21                              |
| Below-ground storage organs  | <b>0.73</b>             | 0.37                  | 0.03        | <b>0.80</b>     | -0.34                      | 0.41                           | -0.67                    | 0.54                               |
| Rhizomatous                  | 0.50                    | 0.68                  | -0.06       | <b>1.45</b>     | 0.07                       | 0.19                           | 0.23                     | -0.23                              |
| Buds close to soil level     | <b>1.41</b>             | -0.12                 | 0.00        | 0.57            | -0.11                      | 0.04                           | -0.26                    | -0.14                              |
| Stoloniferous                | <b>1.26</b>             | -0.46                 | 0.11        | -0.27           | <b>0.77</b>                | -0.09                          | 0.27                     | -0.13                              |
| Creeping                     | <b>1.27</b>             | -0.50                 | 0.10        | -0.30           | <b>0.75</b>                | -0.08                          | 0.30                     | -0.14                              |
| Rosette                      | 0.49                    | -0.02                 | -0.03       | 0.13            | <b>-0.86</b>               | 0.04                           | <b>-0.83</b>             | 0.44                               |
| Cushion forming              | 0.10                    | 0.00                  | -0.01       | -0.14           | -0.17                      | -0.07                          | <b>-0.82</b>             | <b>-1.26</b>                       |
| Prostrate                    | <b>1.44</b>             | -0.43                 | 0.07        | 0.04            | 0.44                       | 0.11                           | 0.05                     | 0.13                               |
| Veg. height over 300cm       | -0.22                   | -0.28                 | <b>1.75</b> | 0.24            | -0.04                      | -0.14                          | -0.01                    | -0.01                              |
| Veg. height 50-300cm         | 0.12                    | 1.49                  | 0.27        | -0.15           | 0.65                       | 0.31                           | -0.35                    | 0.26                               |
| Veg. height 15-50cm          | -0.22                   | -0.06                 | -0.23       | 0.26            | 0.41                       | <b>-1.44</b>                   | -0.43                    | 0.35                               |
| Veg. height 5-15cm           | -0.01                   | 0.36                  | -0.14       | <b>0.82</b>     | 0.05                       | -0.31                          | 0.75                     | -0.64                              |
| Veg. height 0-5cm            | <b>1.53</b>             | -0.01                 | 0.08        | -0.15           | <b>-0.79</b>               | -0.18                          | 0.07                     | 0.15                               |
| Reproduct. height over 300cm | -0.22                   | -0.28                 | <b>1.75</b> | 0.24            | -0.04                      | -0.14                          | -0.01                    | -0.01                              |
| Reproduct. height 50-300cm   | 0.16                    | <b>1.53</b>           | 0.25        | 0.07            | 0.63                       | 0.29                           | -0.20                    | 0.10                               |
| Reproduct. height 15-50cm    | -0.18                   | 0.10                  | -0.26       | 0.67            | 0.34                       | <b>-1.35</b>                   | -0.04                    | -0.02                              |
| Reproduct. height 5-15cm     | 0.41                    | 0.46                  | 0.03        | -0.23           | <b>-1.18</b>               | -0.43                          | <b>0.71</b>              | -0.04                              |
| Reproduct. height 0-5cm      | <b>1.51</b>             | -0.38                 | 0.05        | 0.03            | 0.00                       | 0.13                           | -0.36                    | 0.13                               |
| Epiphyte                     | 0.00                    | 0.00                  | 0.00        | 0.00            | 0.00                       | 0.00                           | 0.00                     | 0.00                               |
| Nanophanerophyte             | -0.13                   | 0.35                  | 0.05        | -0.13           | 0.44                       | 0.35                           | -0.26                    | 0.28                               |
| Micro-mesophanerophyte       | -0.21                   | -0.28                 | <b>1.75</b> | 0.24            | -0.04                      | -0.15                          | -0.01                    | -0.01                              |
| Geophyte                     | 0.53                    | 0.65                  | -0.07       | <b>1.48</b>     | 0.05                       | 0.22                           | 0.17                     | -0.19                              |
| Chamaephyte                  | 0.50                    | -0.20                 | 0.03        | -0.20           | 0.55                       | -0.19                          | 0.03                     | -0.26                              |
| Hemicryptophyte              | <b>1.11</b>             | 0.55                  | 0.18        | <b>-0.71</b>    | -0.69                      | -0.48                          | -0.07                    | 0.23                               |
| Biennial                     | -0.12                   | -0.04                 | -0.15       | 0.24            | 0.33                       | <b>-1.20</b>                   | -0.36                    | 0.44                               |
| Therophyte                   | 0.26                    | -0.26                 | -0.05       | -0.08           | 0.13                       | 0.11                           | 0.42                     | -0.12                              |
| Eigenvalue                   | 5.048                   | 3.630                 | 2.986       | 2.686           | 2.285                      | 2.167                          | 1.735                    | 1.475                              |
| Proportion Explained         | 0.163                   | 0.117                 | 0.096       | 0.087           | 0.074                      | 0.070                          | 0.056                    | 0.048                              |
| Cumulative Proportion        | 0.163                   | 0.280                 | 0.376       | 0.463           | 0.537                      | 0.607                          | 0.663                    | 0.710                              |

Numbers in bold indicate high loadings.

**Table S7. Soil types of the soil profiles studied at sites 1 to 4.**

| Site       | Mollic Leptosol | Phaeozem                    | Umbrisol                     |
|------------|-----------------|-----------------------------|------------------------------|
| 1 (n = 9)  | 2 (IG, IF)      | 4 (2 IF, 2 IG)              | 3 (AG)                       |
| 2 (n = 12) | -               | 8 (2 IF, 1 IG, 3 AF, 2 AG)  | 4 (1 IF, 2 IG, 1 AG)         |
| 3 (n = 12) | -               | 5 (3 IF, 2 AF)              | 7 (3 IG, 1 AF, 3 AG)         |
| 4 (n = 6)  | -               | 1 IF                        | 5 (2 IG, 3 AG)               |
| Total      | 2               | 18 (8 IF, 3 IG, 5 AF, 2 AG) | 19 (1 IF, 7 IG, 1 AF, 10 AG) |

IF=Inaccessible Forest, IG=Inaccessible Grassland, AF=Accessible Forest, AG=Accessible Grassland.  
Soil types are determined according to IUSS Working Group WRB\* and are presented on the level of Reference Soil Groups.

\* "World reference base for soil resources 2014. International classification system for naming soils and creating legends for soil maps", World Soil Resources Report (FAO, Rome, 2014).

**Table S8. Values of aboveground tree carbon, Soil Organic Carbon (SOC), root carbon and total carbon per m<sup>2</sup> for inaccessible and accessible forest and grassland habitats.**

| Carbon stocks (kg m <sup>-2</sup> ) | Value          | Inaccessible forest | Inaccessible grassland | Accessible forest | Accessible grassland |
|-------------------------------------|----------------|---------------------|------------------------|-------------------|----------------------|
| tree carbon                         | min.           | 5.05                |                        | 4.06              |                      |
|                                     | lower quartile | 11.95               |                        | 7.16              |                      |
|                                     | median         | 16.38               |                        | 9.94              |                      |
|                                     | upper quartile | 20.70               |                        | 15.92             |                      |
|                                     | max.           | 33.47               |                        | 22.92             |                      |
|                                     | mean           | 17.00               |                        | 12.74             |                      |
| SOC                                 | min.           | 10.21               | 9.21                   | 3.56              | 10.33                |
|                                     | lower quartile | 10.56               | 14.68                  | 7.73              | 12.81                |
|                                     | median         | 15.26               | 21.39                  | 10.08             | 18.87                |
|                                     | upper quartile | 18.37               | 26.07                  | 10.89             | 22.45                |
|                                     | max.           | 20.07               | 32.07                  | 10.89             | 26.23                |
|                                     | mean           | 15.02               | 20.77                  | 12.39             | 18.11                |
| root carbon                         | min.           | 0.40                | 0.30                   | 0.21              | 0.05                 |
|                                     | lower quartile | 0.56                | 0.59                   | 0.43              | 0.11                 |
|                                     | median         | 1.03                | 0.90                   | 0.63              | 0.44                 |
|                                     | upper quartile | 1.93                | 1.41                   | 0.92              | 0.70                 |
|                                     | max.           | 2.69                | 2.49                   | 1.10              | 1.41                 |
|                                     | mean           | 1.28                | 1.09                   | 0.65              | 0.50                 |
| total carbon                        | min.           | 15.66               | 9.51                   | 7.83              | 10.38                |
|                                     | lower quartile | 23.07               | 15.27                  | 15.31             | 12.92                |
|                                     | median         | 32.67               | 22.29                  | 20.65             | 19.30                |
|                                     | upper quartile | 41.01               | 27.48                  | 27.74             | 23.15                |
|                                     | max.           | 56.22               | 34.56                  | 34.91             | 27.64                |
|                                     | mean           | 33.31               | 21.86                  | 25.78             | 18.60                |

**Table S9. Potential (shaded in grey) and actual carbon stocks of the Cordillera Urubamba**

| carbon (C) stocks                     | area (km <sup>2</sup> ) | min. values of carbon stocks (Gg) | lower quartile values of carbon stocks (Gg) | median values of carbon stocks (Gg) | upper quartile values of carbon stocks (Gg) | max. values of carbon stocks (Gg) | mean carbon stocks (Gg) |
|---------------------------------------|-------------------------|-----------------------------------|---------------------------------------------|-------------------------------------|---------------------------------------------|-----------------------------------|-------------------------|
| <b>potential total tree C</b>         | <b>54075.2</b>          | <b>273.29</b>                     | <b>646.42</b>                               | <b>885.55</b>                       | <b>1119.60</b>                              | <b>1809.69</b>                    | <b>919.39</b>           |
| <b>potential total root C</b>         | <b>76889.7</b>          | <b>28.32</b>                      | <b>43.64</b>                                | <b>76.48</b>                        | <b>136.83</b>                               | <b>202.17</b>                     | <b>94.41</b>            |
| <b>potential total SOC</b>            | <b>76889.7</b>          | <b>762.23</b>                     | <b>905.83</b>                               | <b>1313.33</b>                      | <b>1588.34</b>                              | <b>1816.72</b>                    | <b>1286.14</b>          |
| potential forest root C               | 54075.2                 | 21.41                             | 30.23                                       | 55.84                               | 104.63                                      | 145.28                            | 69.48                   |
| potential grassland root C            | 22814.5                 | 6.92                              | 13.41                                       | 20.65                               | 32.20                                       | 56.89                             | 24.93                   |
| potential forest SOC                  | 54075.2                 | 552.16                            | 570.88                                      | 825.41                              | 993.58                                      | 1085.13                           | 812.32                  |
| potential grassland SOC               | 22814.5                 | 210.07                            | 334.95                                      | 487.92                              | 594.76                                      | 731.59                            | 473.81                  |
| potential forest C                    | 54075.2                 | 846.85                            | 1247.53                                     | 1766.80                             | 2217.80                                     | 3040.10                           | 1801.20                 |
| potential grassland C                 | 22814.5                 | 216.98                            | 348.36                                      | 508.56                              | 626.97                                      | 788.48                            | 498.74                  |
| potential total C                     | 76889.7                 | 1063.84                           | 1595.89                                     | 2275.37                             | 2844.77                                     | 3828.58                           | 2299.94                 |
| <b>actual total tree C</b>            | <b>6665.2</b>           | <b>28.07</b>                      | <b>52.48</b>                                | <b>72.67</b>                        | <b>110.86</b>                               | <b>163.29</b>                     | <b>89.14</b>            |
| <b>actual total root C</b>            | <b>76889.7</b>          | <b>5.35</b>                       | <b>11.21</b>                                | <b>35.49</b>                        | <b>56.65</b>                                | <b>108.63</b>                     | <b>40.04</b>            |
| <b>actual total SOC</b>               | <b>76889.7</b>          | <b>755.03</b>                     | <b>954.38</b>                               | <b>1398.31</b>                      | <b>1657.86</b>                              | <b>1926.25</b>                    | <b>1357.83</b>          |
| actual inaccessible forest tree C     | 995.2                   | 5.03                              | 11.90                                       | 16.30                               | 20.61                                       | 33.31                             | 16.92                   |
| actual inaccessible forest root C     | 995.2                   | 0.39                              | 0.56                                        | 1.03                                | 1.93                                        | 2.67                              | 1.28                    |
| actual inaccessible grassland root C  | 419.9                   | 0.13                              | 0.25                                        | 0.38                                | 0.59                                        | 1.05                              | 0.46                    |
| actual inaccessible forest SOC        | 995.2                   | 10.16                             | 10.51                                       | 15.19                               | 18.29                                       | 19.97                             | 14.95                   |
| actual inaccessible grassland SOC     | 419.9                   | 3.87                              | 6.16                                        | 8.98                                | 10.95                                       | 13.46                             | 8.72                    |
| actual accessible forest tree C       | 5670.0                  | 23.04                             | 40.58                                       | 56.37                               | 90.26                                       | 129.98                            | 72.21                   |
| actual accessible forest root C       | 5670.0                  | 1.21                              | 2.41                                        | 3.56                                | 5.24                                        | 6.22                              | 3.70                    |
| actual accessible grassland root C    | 69804.6                 | 3.62                              | 8.00                                        | 30.53                               | 48.89                                       | 98.69                             | 34.60                   |
| actual accessible forest SOC          | 5670.0                  | 20.16                             | 43.81                                       | 57.14                               | 61.76                                       | 61.76                             | 70.24                   |
| actual accessible grassland SOC       | 69804.6                 | 720.84                            | 893.89                                      | 1316.99                             | 1566.87                                     | 1831.05                           | 1263.92                 |
| total actual inaccessible forest C    | 995.2                   | 15.59                             | 22.96                                       | 32.52                               | 40.82                                       | 55.95                             | 33.15                   |
| total actual inaccessible grassland C | 419.9                   | 3.99                              | 6.41                                        | 9.36                                | 11.54                                       | 14.51                             | 9.18                    |
| total actual accessible forest C      | 5670.0                  | 44.41                             | 86.80                                       | 117.07                              | 157.26                                      | 197.96                            | 146.15                  |
| total actual accessible grassland C   | 69804.6                 | 724.46                            | 901.89                                      | 1347.52                             | 1615.75                                     | 1929.74                           | 1298.52                 |
| actual total                          | 76889.7                 | 788.46                            | 1018.07                                     | 1506.47                             | 1825.37                                     | 2198.17                           | 1487.00                 |

Estimated values of potential (shaded in grey) and actual carbon stocks in the high elevation area mapped of the Cordillera Urubamba (132,660 km<sup>2</sup>; Fig. 1a, 2a). Values estimated using carbon stock values from inaccessible and accessible forest and grassland (Table S8) extrapolated over the areas calculated using landscape mapping (Table S1). 'tree' refers to the aboveground carbon of trees. Values for potential and current overall tree, root and SOC carbon stocks are in bold and shown graphically in Fig. 5d.



**Table S10. Estimated values of current carbon stocks per m<sup>2</sup> for inaccessible and accessible landscapes given the proportions of forest and grassland vegetation type calculated from landscape mapping (see Table S1) and the values of carbon per habitat type in Table S8.**

| Habitat      | min. values of carbon stocks (kg m <sup>-2</sup> ) | lower quartile values of carbon stocks (kg m <sup>-2</sup> ) | median values of carbon stocks (kg m <sup>-2</sup> ) | upper quartile values of carbon stocks (kg m <sup>-2</sup> ) | max. values of carbon stocks (kg m <sup>-2</sup> ) | mean carbon stocks (kg m <sup>-2</sup> ) |
|--------------|----------------------------------------------------|--------------------------------------------------------------|------------------------------------------------------|--------------------------------------------------------------|----------------------------------------------------|------------------------------------------|
| Inaccessible | 13.84                                              | 20.76                                                        | 29.59                                                | 37.00                                                        | 49.80                                              | 29.91                                    |
| Accessible   | 10.19                                              | 13.10                                                        | 19.41                                                | 23.49                                                        | 28.19                                              | 19.14                                    |

**Table S11. Mean climate values of the Cordillera Urubamba and Vilcabamba averaging all datalogger sources.**

|            | Absolute minimum temperature (°C) | Absolute maximum temperature (°C) | Mean daily minimum temperature (°C) | Mean daily maximum temperature (°C) | Mean daily temperature (°C) | Mean daily temperature variation | Absolute max daily temperature variation | Days yr <sup>-1</sup> where max temperature doesn't reach 5°C | Days yr <sup>-1</sup> where temperature dropped equal or below 0°C | Absolute minimum relative humidity (%) | Mean daily relative humidity (%) | Days yr <sup>-1</sup> where relative humidity passed 90% | Days yr <sup>-1</sup> with fog occurrence (relative humidity passed 99%) |
|------------|-----------------------------------|-----------------------------------|-------------------------------------|-------------------------------------|-----------------------------|----------------------------------|------------------------------------------|---------------------------------------------------------------|--------------------------------------------------------------------|----------------------------------------|----------------------------------|----------------------------------------------------------|--------------------------------------------------------------------------|
| Urubamba   | -3.9                              | 27.3                              | 0.6                                 | 11.7                                | 4.6                         | 11.1                             | 27.9                                     | 34.0                                                          | 167.8                                                              | 20.3                                   | 84.7                             | 261.3                                                    | 180.9                                                                    |
| Vilcabamba | -6.4                              | 17.6                              | 1.2                                 | 8.7                                 | 4.1                         | 7.5                              | 19.2                                     | 25.1                                                          | 88.1                                                               | 24.1                                   | 90.7                             | 299.3                                                    | 207.3                                                                    |

Urubamba values based on 12 dataloggers placed at sites 1–4 with recordings made between October 2010–July 2012. Vilcabamba values based on 7 dataloggers placed at sites 5, 6 and 8 with recordings made between May 2012–April 2013. Site 5, although belonging to the Cordillera Urubamba, had a climate more similar to that of the Cordillera Vilcabamba with a correspondingly similar vegetation, and so is treated here as such.

**Table S12. LMM analysis results of the differences in climate properties between inaccessible and accessible sites in forest habitats.**

| Climate property (transformation, if any, in brackets)     | Effect       | Estimate | Std. Error | df     | t value | Pr(> t ) |
|------------------------------------------------------------|--------------|----------|------------|--------|---------|----------|
| Mean daily temperature (log10)                             | (Intercept)  | 1.38653  | 0.06112    | 11.771 | 22.684  | <0.001   |
|                                                            | Human impact | 0.14484  | 0.08464    | 10.829 | 1.711   | 0.115    |
| Mean daily minimum temperature                             | (Intercept)  | 0.7128   | 0.3966     | 12.505 | 1.797   | 0.0965   |
|                                                            | Human impact | 0.1539   | 0.4745     | 11.015 | 0.324   | 0.7518   |
| Mean daily maximum temperature                             | (Intercept)  | 9.832    | 1.761      | 10.152 | 5.582   | <0.001   |
|                                                            | Human impact | 1.938    | 2.276      | 5.054  | 0.851   | 0.433009 |
| Absolute minimum temperature                               | (Intercept)  | -4.028   | 1.525      | 17     | -2.641  | 0.0171   |
|                                                            | Human impact | -1.447   | 2.10E+00   | 17     | -0.688  | 0.5006   |
| Absolute maximum temperature (log10)                       | (Intercept)  | 3.0305   | 0.1245     | 13.04  | 24.351  | <0.001   |
|                                                            | Human impact | 0.1302   | 0.1601     | 10.299 | 0.813   | 0.435    |
| Mean daily temperature variation (log10)                   | (Intercept)  | 2.1155   | 0.1482     | 12.37  | 14.277  | <0.001   |
|                                                            | Human impact | 0.1434   | 0.189      | 9.627  | 0.759   | 0.466    |
| Absolute max. daily temperature variation (log10)          | (Intercept)  | 3.033    | 0.1446     | 17     | 20.98   | <0.001   |
|                                                            | Human impact | 0.1565   | 0.1993     | 17     | 0.786   | 0.443    |
| Days yr where max. temperature does not reach 5°C (log10)  | (Intercept)  | 3.0486   | 0.4126     | 13.742 | 7.389   | <0.001   |
|                                                            | Human impact | -0.5616  | 0.5633     | 7.15   | -0.997  | 0.351    |
| Days yr where temperature dropped equal or below 0°C       | (Intercept)  | 152.78   | 32.63      | 17     | 4.683   | <0.001   |
|                                                            | Human impact | -27.28   | 44.97      | 17     | -0.607  | 0.552161 |
| Mean daily relative humidity                               | (Intercept)  | 88.027   | 2.155      | 10.234 | 40.85   | <0.001   |
|                                                            | Human impact | -2.358   | 2.204      | 6.844  | -1.07   | 0.321    |
| Days yr where relative humidity passed 90%                 | (Intercept)  | 280.67   | 19.32      | 17     | 14.525  | <0.001   |
|                                                            | Human impact | -10.17   | 26.64      | 17     | -0.382  | 0.707    |
| Days yr with fog occurrence (relative humidity passed 99%) | (Intercept)  | 203      | 16         | 17     | 12.686  | <0.001   |
|                                                            | Human impact | -23.5    | 22.06      | 17     | -1.065  | 0.302    |
| Absolute minimum relative humidity (log10)                 | (Intercept)  | 3.0077   | 0.2484     | 12.689 | 12.109  | <0.001   |
|                                                            | Human impact | -0.3797  | 0.324      | 6.117  | -1.172  | 0.285    |

If values were transformed prior to analysis, the type of transformation is shown in brackets alongside the name of the property. Our models used the fixed effect, human impact, and two sets of random effects that crossed the fixed effects with sites 1–6, 8 and the covariate elevation. The climate properties were calculated from temperature and relative humidity data collected from 19 data sources; 9 from inaccessible habitats and 10 from accessible habitats across the seven sites (See Table S11).

**Table S13. GLMM analysis results of the effect of human impact, vegetation type and the interaction between human impact and vegetation type on different vegetation type structure properties.**

| Vegetation type structure property                                                                                                                                 | Effect          | Estimate | Std. Error | z value | Pr(> z ) |
|--------------------------------------------------------------------------------------------------------------------------------------------------------------------|-----------------|----------|------------|---------|----------|
| Proportion of standing deadwood trees per 10x10m <sup>2</sup> plot [logit] (Gaussian GLMM with identity link function and zero inflation being taken into account) | (Intercept)     | 3.547    | 0.158      | -22.5   | <0.001   |
|                                                                                                                                                                    | Human impact    | -1.477   | 0.197      | -7.48   | <0.001   |
| Average height of forb communities per 2x2m <sup>2</sup> plot (Gamma GLMM with log link function)                                                                  | (Intercept)     | 3.3186   | 0.0806     | 41.15   | <0.001   |
|                                                                                                                                                                    | Human impact    | -1.3264  | 0.075      | -17.68  | <0.001   |
|                                                                                                                                                                    | Vegetation type | 0.2849   | 0.0818     | 3.48    | <0.001   |
|                                                                                                                                                                    | Interaction     | -0.6249  | 0.1189     | -5.25   | <0.001   |
| Maximum height of forb communities per 2x2m <sup>2</sup> plot (Gamma GLMM with log link function)                                                                  | (Intercept)     | 4.3573   | 0.0577     | 75.54   | <0.001   |
|                                                                                                                                                                    | Human impact    | -0.7631  | 0.0541     | -14.1   | <0.001   |
|                                                                                                                                                                    | Vegetation type | 0.0702   | 0.0596     | 1.18    | 0.239    |
|                                                                                                                                                                    | Interaction     | -0.1432  | 0.0851     | -1.68   | 0.093    |
| Cover of bare soil per 2x2m <sup>2</sup> plot [logit] (Gaussian GLMM with identity link function and zero inflation being taken into account)                      | (Intercept)     | -3.3246  | 0.1213     | -27.4   | <0.001   |
|                                                                                                                                                                    | Human impact    | 1.3039   | 0.0987     | 13.21   | <0.001   |
|                                                                                                                                                                    | Vegetation type | 0.1842   | 0.1048     | 1.76    | 0.079    |
|                                                                                                                                                                    | Interaction     | -0.2694  | 0.15       | -1.8    | 0.073    |
| Cover of litter per 2x2m <sup>2</sup> plot [logit] (Gaussian GLMM with identity link function)                                                                     | (Intercept)     | 0.0914   | 0.2165     | 0.42    | 0.67     |
|                                                                                                                                                                    | Human impact    | -2.2581  | 0.125      | -18.06  | <0.001   |
|                                                                                                                                                                    | Vegetation type | 0.1975   | 0.138      | 1.43    | 0.15     |
|                                                                                                                                                                    | Interaction     | -0.8766  | 0.1966     | -4.46   | <0.001   |
| Percentage grazing per 2x2m <sup>2</sup> plot [logit] (Gaussian GLMM with identity link function and zero inflation being taken into account)                      | (Intercept)     | -3.3130  | 0.1993     | -16.63  | <0.001   |
|                                                                                                                                                                    | Human impact    | 2.2324   | 0.0848     | 26.32   | <0.001   |
|                                                                                                                                                                    | Vegetation type | 0.09526  | 0.0936     | 1.02    | 0.31     |
|                                                                                                                                                                    | Interaction     | -0.00129 | 0.1334     | -0.01   | 0.99     |

If values were transformed prior to analysis, the type of transformation is shown in square brackets alongside the name of the property. The exponential family and link function of the GLMM is written in parentheses alongside the name of the property. Our models used fixed effects (human impact + vegetation type + human impact x vegetation type) and random effects. For 'Proportion of standing deadwood trees per 10x10m<sup>2</sup> plot', the random effects 'tree species', 'Cordillera' and 'elevation' were used. To treat elevation as a random effect, elevational values 4211–4812 m a.s.l. were converted into a factor with 20 levels with each level referring to an elevational difference of 30.05 m. The random effect for all other vegetation type structure properties was the factor 'site' with 8 levels corresponding to sites 1-8 across the Cordilleras Urubamba and Vilcabamba.

**Table S14. LMM analysis results of the effect of human impact on forest structure properties.**

| Vegetation type structure property                                      | Effect       | Estimate | Std. Error | df    | t value | Pr(> t ) |
|-------------------------------------------------------------------------|--------------|----------|------------|-------|---------|----------|
| Total aboveground biomass of trees per 10x10m <sup>2</sup> plot (log10) | (Intercept)  | 7.6985   | 0.1944     | 1.24  | 39.609  | 0.00716  |
|                                                                         | Human impact | 0.434    | 0.1483     | 46    | 2.926   | 0.00531  |
| Average aboveground biomass of trees per 10x10m <sup>2</sup> plot       | (Intercept)  | 100.187  | 3.76       | 0.71  | 26.643  | 0.0611   |
|                                                                         | Human impact | 5.249    | 2.209      | 40.67 | 2.376   | 0.0223   |
| Max. aboveground biomass of trees per 10x10m <sup>2</sup> plot          | (Intercept)  | 111.893  | 3.844      | 0.86  | 29.108  | 0.0347   |
|                                                                         | Human impact | 9.396    | 1.776      | 43.57 | 5.292   | <0.001   |
| Stand basal area (log10)                                                | (Intercept)  | 5.8983   | 0.3345     | 1.09  | 17.633  | 0.0288   |
|                                                                         | Human impact | 1.0061   | 0.1621     | 45.62 | 6.207   | <0.001   |
| Mean dbh of trees per 10x10m <sup>2</sup> plot (log10)                  | (Intercept)  | 2.5791   | 0.2694     | 1.09  | 9.573   | 0.0551   |
|                                                                         | Human impact | 0.2543   | 0.1192     | 42.22 | 2.134   | 0.0387   |
| Mean height of trees per 10x10m <sup>2</sup> plot (log10)               | (Intercept)  | 1.5383   | 0.13768    | 4.19  | 11.173  | <0.001   |
|                                                                         | Human impact | 0.31495  | 0.09821    | 42.29 | 3.207   | 0.002556 |
| Max. height of trees per 10x10m <sup>2</sup> plot (log10)               | (Intercept)  | 2.7461   | 0.2114     | 3.62  | 12.987  | <0.001   |
|                                                                         | Human impact | 0.7302   | 0.1241     | 41.16 | 5.883   | <0.001   |

If values were transformed prior to analysis, the type of transformation is shown in brackets alongside the name of the property. Our models used the fixed effect, human impact, and random effects (tree species, Cordillera, elevation).

**Table S15. GLMM analysis results on the effect of human impact, vegetation type and the interaction between human impact and vegetation type on different biodiversity properties.**

| Ecosystem property                                                                                                                                           | Effect          | Estimate | Std. Error | z value   | Pr(> z ) |
|--------------------------------------------------------------------------------------------------------------------------------------------------------------|-----------------|----------|------------|-----------|----------|
| Vascular plant species richness per 2x2m <sup>2</sup> plot (Negative binomial GLMM with log link function to account for the heterogeneity of variance)      | (Intercept)     | 2.1944   | 0.0571     | 38.45     | <0.001   |
|                                                                                                                                                              | Human impact    | 0.8904   | 0.0451     | 1.97E+01  | <0.001   |
|                                                                                                                                                              | Vegetation type | 0.0407   | 0.056      | 0.73      | 0.47     |
|                                                                                                                                                              | Interaction     | 0.0641   | 0.0721     | 0.89      | 0.37     |
| Cover of undescribed spp. per 2x2m <sup>2</sup> plot [logit] (Gaussian GLMM with identity link function and zero inflation being taken into account)         | (Intercept)     | -0.445   | 0.334      | -1.34     | 0.182    |
|                                                                                                                                                              | Human impact    | -2.868   | 0.21       | -1.37E+01 | <0.001   |
|                                                                                                                                                              | Vegetation type | -0.469   | 0.232      | -2.02     | 0.043    |
|                                                                                                                                                              | Interaction     | 0.456    | 0.33       | 1.38      | 0.167    |
| Proportion of undescribed species per 2x2m <sup>2</sup> plot [logit] (Gaussian GLMM with identity link function and zero inflation being taken into account) | (Intercept)     | 20.69    | 1.75       | 11.8      | <0.001   |
|                                                                                                                                                              | Human impact    | -17.69   | 1.78       | -9.94     | <0.001   |
|                                                                                                                                                              | Vegetation type | -2.47    | 1.71       | -1.45     | 0.15     |
|                                                                                                                                                              | Interaction     | 2.5      | 2.78       | 0.9       | 0.37     |
| Cover of introduced species per 2x2m <sup>2</sup> plot [logit] (Gaussian GLMM with identity link function and zero inflation being taken into account)       | (Intercept)     | -3.6649  | 0.0658     | -55.69    | <0.001   |
|                                                                                                                                                              | Human impact    | 0.4478   | 0.0429     | 10.44     | <0.001   |
|                                                                                                                                                              | Vegetation type | 0.0197   | 0.0465     | 0.42      | 0.6722   |
|                                                                                                                                                              | Interaction     | -0.2055  | 0.0675     | -3.04     | 0.0023   |
| Proportion of introduced species per 2x2m <sup>2</sup> plot [logit] (Gaussian GLMM with identity link function and zero inflation being taken into account)  | (Intercept)     | -3.6709  | 0.1063     | -34.53    | <0.001   |
|                                                                                                                                                              | Human impact    | 0.8355   | 0.0601     | 13.91     | <0.001   |
|                                                                                                                                                              | Vegetation type | 0.0296   | 0.0663     | 0.45      | 0.65511  |
|                                                                                                                                                              | Interaction     | -0.3538  | 0.0945     | -3.74     | <0.001   |
| Average latitudinal range size of all vascular plant species per 2x2m <sup>2</sup> plot (Gamma GLMM with log link function)                                  | (Intercept)     | 6.8052   | 0.0583     | 116.8     | <0.001   |
|                                                                                                                                                              | Human impact    | 0.7798   | 0.0481     | 16.22     | <0.001   |
|                                                                                                                                                              | Vegetation type | 0.4188   | 0.053      | 7.9       | <0.001   |
|                                                                                                                                                              | Interaction     | -0.308   | 0.0758     | -4.06     | <0.001   |
| Average latitudinal range size of vascular plant species per 2x2m <sup>2</sup> plot excluding introduced species (Gamma GLMM with log link function)         | (Intercept)     | 6.8053   | 0.0515     | 132.08    | <0.001   |
|                                                                                                                                                              | Human impact    | 0.6427   | 0.0475     | 13.54     | <0.001   |
|                                                                                                                                                              | Vegetation type | 0.4098   | 0.0525     | 7.81      | <0.001   |
|                                                                                                                                                              | Interaction     | -0.2133  | 0.0750     | -2.84     | 0.0045   |
| Epiphytic lichen species richness per 600cm <sup>2</sup> plot (Negative binomial GLMM with log link function to account for the heterogeneity of variance)   | (Intercept)     | 1.9965   | 0.1899     | 10.51     | <0.001   |
|                                                                                                                                                              | Human impact    | -0.6461  | 0.0698     | -9.26     | <0.001   |

If values were transformed prior to analysis, the type of transformation is shown in square brackets alongside the name of the property. The exponential family and link function of the GLMM is written in parentheses alongside the name of the property. In all properties apart from 'Epiphytic lichen species richness per 600cm<sup>2</sup> plot', our models used fixed effects (human impact + vegetation type + human impact x vegetation type) and one set of random effects that crossed these fixed effects with sites 1–8 across the Cordilleras Urubamba and Vilcabamba. For property 'Epiphytic lichen species richness per 600cm<sup>2</sup> plot', the fixed effect was 'substrate type', with the two levels 'deadwood' and 'live', while the factor 'site', with four levels corresponding to the sites 1–4 of the Cordillera Urubamba, was treated as a random effect.



**Table S16. LMM analysis results of the effect of human impact, vegetation type and the interaction between human impact and vegetation type on plant trait syndromes represented by principal components.**

| Principal component                | Effect          | Estimate | Std. Error | df    | t value | Pr(> t ) |
|------------------------------------|-----------------|----------|------------|-------|---------|----------|
| PC1 'low-growing herbs'            | (Intercept)     | -0.01721 | 0.04361    | 9.1   | -0.394  | 0.702    |
|                                    | Human impact    | 0.55008  | 0.02978    | 465.5 | 18.472  | <0.001   |
|                                    | Vegetation type | 0.29292  | 0.03294    | 465   | 8.892   | <0.001   |
|                                    | Interaction     | 0.01966  | 0.04693    | 464.6 | 0.419   | 0.675    |
| PC2 'tussock grasses'              | (Intercept)     | 0.66583  | 0.07378    | 10.9  | 9.025   | <0.001   |
|                                    | Human impact    | -0.62479 | 0.05387    | 466.3 | -11.597 | <0.001   |
|                                    | Vegetation type | 0.27328  | 0.0596     | 465.9 | 4.585   | <0.001   |
|                                    | Interaction     | -0.29732 | 0.08491    | 465.6 | -3.502  | <0.001   |
| PC3 'trees'                        | (Intercept)     | 1.26177  | 0.07891    | 9.7   | 15.989  | <0.001   |
|                                    | Human impact    | -0.74503 | 0.05051    | 465.3 | -14.749 | <0.001   |
|                                    | Vegetation type | -0.9244  | 0.05588    | 464.8 | -16.544 | <0.001   |
|                                    | Interaction     | 0.47708  | 0.07959    | 464.4 | 5.994   | <0.001   |
| PC4 'geophytes'                    | (Intercept)     | 0.31543  | 0.09497    | 8.5   | 3.321   | 0.00959  |
|                                    | Human impact    | -0.01624 | 0.04293    | 463   | -0.378  | 0.7054   |
|                                    | Vegetation type | -0.34628 | 0.04747    | 462.6 | -7.295  | <0.001   |
|                                    | Interaction     | 0.13247  | 0.0676     | 462.1 | 1.96    | 0.05065  |
| PC5 'large creeping forbs'         | (Intercept)     | 0.32513  | 0.06338    | 10.1  | 5.13    | <0.001   |
|                                    | Human impact    | -0.55231 | 0.03913    | 465.2 | -14.113 | <0.001   |
|                                    | Vegetation type | -0.17307 | 0.04329    | 464.8 | -3.998  | <0.001   |
|                                    | Interaction     | -0.03488 | 0.06166    | 464.3 | -0.566  | 0.571909 |
| PC6 'not large biennial herbs'     | (Intercept)     | -0.33607 | 0.04806    | 13.2  | -6.993  | <0.001   |
|                                    | Human impact    | 0.17684  | 0.0413     | 467.4 | 4.282   | <0.001   |
|                                    | Vegetation type | -0.20814 | 0.0457     | 467   | -4.554  | <0.001   |
|                                    | Interaction     | 0.26425  | 0.06511    | 467.2 | 4.059   | <0.001   |
| PC7 'short graminoids'             | (Intercept)     | -0.03736 | 0.072      | 8.6   | -0.519  | 0.617    |
|                                    | Human impact    | 0.1981   | 0.02771    | 462.3 | 7.149   | <0.001   |
|                                    | Vegetation type | -0.01022 | 0.03064    | 462.1 | -0.334  | 0.739    |
|                                    | Interaction     | -0.01131 | 0.04363    | 461.7 | -0.259  | 0.796    |
| PC8 'not spiny or cushion forming' | (Intercept)     | 0.04601  | 0.04777    | 8.7   | 0.963   | 0.361416 |
|                                    | Human impact    | -0.08383 | 0.02276    | 463.3 | -3.684  | <0.001   |
|                                    | Vegetation type | 0.05182  | 0.02517    | 462.9 | 2.059   | 0.040021 |
|                                    | Interaction     | -0.0577  | 0.03584    | 462.4 | -1.61   | 0.108058 |

Our models used fixed effects (human impact + vegetation type + human impact × vegetation type) and one set of random effects that crossed these fixed effects with sites 1-8 across the Cordilleras Urubamba and Vilcabamba.

**Table S17. LMM analysis results of the effect of human impact, vegetation type and the interaction between human impact and vegetation type on different soil properties.**

| Soil property<br>(transformation in<br>brackets) | Effect          | Estimate  | Std. Error | df       | t value | Pr(> t ) |
|--------------------------------------------------|-----------------|-----------|------------|----------|---------|----------|
| CEC (log10)                                      | (Intercept)     | 7.87834   | 0.14757    | 16.77    | 53.387  | <0.001   |
|                                                  | Human impact    | -0.35523  | 0.22052    | 34.38    | -1.611  | 0.116    |
|                                                  | Vegetation type | -0.28446  | 0.18379    | 32.91    | -1.548  | 0.131    |
|                                                  | Interaction     | 0.03694   | 0.28217    | 34       | 0.131   | 0.897    |
| pH                                               | (Intercept)     | 8.20E-05  | 1.98E-05   | 9.06E+00 | 4.144   | 0.00247  |
|                                                  | Human impact    | -1.54E-05 | 2.52E-05   | 3.34E+01 | -0.612  | 0.54493  |
|                                                  | Vegetation type | 1.10E-05  | 2.08E-05   | 3.24E+01 | 0.527   | 0.60177  |
|                                                  | Interaction     | 6.05E-06  | 3.22E-05   | 3.31E+01 | 0.188   | 0.85208  |
| Mn (log10)                                       | (Intercept)     | 1.60962   | 0.13683    | 5.9      | 11.763  | <0.001   |
|                                                  | Human impact    | 0.08187   | 0.14421    | 32.73    | 0.568   | 0.57408  |
|                                                  | Vegetation type | -0.0176   | 0.11858    | 32.12    | -0.148  | 0.88294  |
|                                                  | Interaction     | -0.53825  | 0.18379    | 32.57    | -2.929  | 0.00617  |
| Nt (sqrt)                                        | (Intercept)     | 33.8743   | 3.6688     | 4.58     | 9.233   | <0.001   |
|                                                  | Human impact    | -3.2857   | 3.2508     | 32.37    | -1.011  | 0.319641 |
|                                                  | Vegetation type | 5.6965    | 2.6681     | 31.97    | 2.135   | 0.040519 |
|                                                  | Interaction     | -0.5064   | 4.1409     | 32.26    | -0.122  | 0.903434 |
| Ca (log10)                                       | (Intercept)     | 7.1469    | 0.3521     | 9.47     | 20.297  | <0.001   |
|                                                  | Human impact    | -0.214    | 0.4668     | 33.41    | -0.458  | 0.64966  |
|                                                  | Vegetation type | -1.0812   | 0.386      | 32.17    | -2.801  | 0.00855  |
|                                                  | Interaction     | -0.711    | 0.5959     | 33.08    | -1.193  | 0.24127  |
| Mg (sqrt)                                        | (Intercept)     | 22.072    | 2.762      | 12.09    | 7.991   | <0.001   |
|                                                  | Human impact    | -7.525    | 4.008      | 33.86    | -1.878  | 0.0691   |
|                                                  | Vegetation type | -10.88    | 3.332      | 32.02    | -3.266  | 0.0026   |
|                                                  | Interaction     | 5.493     | 5.124      | 33.38    | 1.072   | 0.2915   |
| K (sqrt)                                         | (Intercept)     | 8.802     | 0.7194     | 5.58     | 12.235  | <0.001   |
|                                                  | Human impact    | -0.527    | 0.7075     | 32.72    | -0.745  | 0.462    |
|                                                  | Vegetation type | -0.508    | 0.5813     | 32.23    | -0.874  | 0.389    |
|                                                  | Interaction     | -1.1077   | 0.9015     | 32.58    | -1.229  | 0.228    |
| Na (sqrt)                                        | (Intercept)     | 4.0365    | 0.4021     | 8.4      | 10.038  | <0.001   |
|                                                  | Human impact    | -1.2432   | 0.509      | 33.22    | -2.442  | 0.0201   |
|                                                  | Vegetation type | -0.6499   | 0.4203     | 32.16    | -1.546  | 0.1318   |
|                                                  | Interaction     | 0.7278    | 0.6495     | 32.93    | 1.121   | 0.2705   |
| Al                                               | (Intercept)     | 537.53    | 188.89     | 8.81     | 2.846   | 0.0196   |
|                                                  | Human impact    | -99.28    | 249.78     | 33.26    | -0.397  | 0.6936   |
|                                                  | Vegetation type | 548.4     | 206.55     | 31.94    | 2.655   | 0.0123   |
|                                                  | Interaction     | -87.71    | 318.85     | 32.9     | -0.275  | 0.785    |

If values were transformed prior to analysis, the type of transformation is shown in brackets alongside the name of the property. Our models used fixed effects (human impact + vegetation type + human impact x vegetation type) and one set of random effects that crossed the fixed effects with sites 1–4. Absolute pH values were not used, but, instead, we used the actual proton (H<sup>+</sup>) concentration as this is metric and rationally scaled.

**Table S17 cont. LMM analysis results of the effect of human impact, vegetation type and the interaction between human impact and vegetation type on different soil properties.**

| Soil property<br>(transformation in<br>brackets) | Effect          | Estimate | Std. Error | df       | t value | Pr(> t ) |
|--------------------------------------------------|-----------------|----------|------------|----------|---------|----------|
| Fe (log10)                                       | (Intercept)     | 0.49644  | 0.14045    | 15.19    | 3.534   | 0.00295  |
|                                                  | Human impact    | -0.08065 | 0.21171    | 34.28    | -0.381  | 0.70561  |
|                                                  | Vegetation type | -0.0729  | 0.17662    | 32.39    | -0.413  | 0.6825   |
|                                                  | Interaction     | -0.05628 | 0.27098    | 33.8     | -0.208  | 0.83671  |
| Mn (log10)                                       | (Intercept)     | 1.60962  | 0.13683    | 5.9      | 11.763  | <0.001   |
|                                                  | Human impact    | 0.08187  | 0.14421    | 32.73    | 0.568   | 0.57408  |
|                                                  | Vegetation type | -0.0176  | 0.11858    | 32.12    | -0.148  | 0.88294  |
|                                                  | Interaction     | -0.53825 | 0.18379    | 32.57    | -2.929  | 0.00617  |
| H (sqrt)                                         | (Intercept)     | 5.4836   | 0.9644     | 7.42     | 5.686   | <0.001   |
|                                                  | Human impact    | -1.115   | 1.1472     | 33.05    | -0.972  | 0.338129 |
|                                                  | Vegetation type | 0.2673   | 0.9455     | 32.2     | 0.283   | 0.779164 |
|                                                  | Interaction     | -0.3398  | 1.463      | 32.82    | -0.232  | 0.817782 |
| bases (log10)                                    | (Intercept)     | 7.5303   | 0.2972     | 10.4     | 25.337  | <0.001   |
|                                                  | Human impact    | -0.3467  | 0.4055     | 33.58    | -0.855  | 0.39856  |
|                                                  | Vegetation type | -0.9937  | 0.3358     | 32.22    | -2.959  | 0.00574  |
|                                                  | Interaction     | -0.467   | 0.5178     | 33.21    | -0.902  | 0.37364  |
| C:N ratio                                        | (Intercept)     | 14.2585  | 0.9443     | 4.42     | 15.099  | <0.001   |
|                                                  | Human impact    | 0.1484   | 0.7743     | 32.39    | 0.192   | 0.849    |
|                                                  | Vegetation type | -0.8538  | 0.6351     | 32.06    | -1.344  | 0.188    |
|                                                  | Interaction     | 0.4362   | 0.9861     | 32.3     | 0.442   | 0.661    |
| Rock content                                     | (Intercept)     | 0.49397  | 0.06557    | 11.14    | 7.533   | <0.001   |
|                                                  | Human impact    | 0.02244  | 0.08844    | 33.71    | 0.254   | 0.801    |
|                                                  | Vegetation type | -0.0269  | 0.0732     | 32.57    | -0.367  | 0.716    |
|                                                  | Interaction     | -0.13398 | 0.11293    | 33.41    | -1.186  | 0.244    |
| Root biomass (sqrt)                              | (Intercept)     | 46.175   | 6.207      | 5.13     | 7.439   | <0.001   |
|                                                  | Human impact    | -11.56   | 6.156      | 3.25E+01 | -1.878  | 0.069385 |
|                                                  | Vegetation type | -2.525   | 5.058      | 31.94    | -0.499  | 0.621064 |
|                                                  | Interaction     | -3.578   | 7.844      | 32.33    | -0.456  | 0.651296 |
| Bulk density (log10)                             | (Intercept)     | -0.52422 | 0.17122    | 4.52     | -3.062  | 0.032    |
|                                                  | Human impact    | 0.15506  | 0.1448     | 32.41    | 1.071   | 0.292    |
|                                                  | Vegetation type | 0.06768  | 0.1188     | 32.06    | 0.57    | 0.573    |
|                                                  | Interaction     | -0.07991 | 0.18443    | 32.31    | -0.433  | 0.668    |
| Soil mass                                        | (Intercept)     | 265.123  | 50.216     | 7.24     | 5.28    | 0.00103  |
|                                                  | Human impact    | -6.769   | 59.803     | 32.99    | -0.113  | 0.91057  |
|                                                  | Vegetation type | 1.416    | 49.289     | 32.11    | 0.029   | 0.97726  |
|                                                  | Interaction     | -3.845   | 76.267     | 32.75    | -0.05   | 0.9601   |

If values were transformed prior to analysis, the type of transformation is shown in brackets alongside the name of the property. Our models used fixed effects (human impact + vegetation type + human impact × vegetation type) and one set of random effects that crossed the fixed effects with sites 1–4. Absolute pH values were not used, but, instead, we used the actual proton (H<sup>+</sup>) concentration as this is metric and rationally scaled.

**Table S17 cont. LMM analysis results of the effect of human impact, vegetation type and the interaction between human impact and vegetation type on different soil properties.**

| Soil property<br>(transformation in<br>brackets) | Effect          | Estimate | Std. Error | df    | t value | Pr(> t ) |
|--------------------------------------------------|-----------------|----------|------------|-------|---------|----------|
| Soil depth                                       | (Intercept)     | 60.236   | 8.792      | 5.3   | 6.852   | <0.001   |
|                                                  | Human impact    | -16.282  | 8.573      | 32.6  | -1.899  | 0.0664   |
|                                                  | Vegetation type | -2.856   | 7.043      | 32.1  | -0.406  | 0.6878   |
|                                                  | Interaction     | 2.236    | 10.923     | 32.47 | 0.205   | 0.8391   |

If values were transformed prior to analysis, the type of transformation is shown in brackets alongside the name of the property. Our models used fixed effects (human impact + vegetation type + human impact x vegetation type) and one set of random effects that crossed the fixed effects with sites 1–4. Absolute pH values were not used, but, instead, we used the actual proton (H<sup>+</sup>) concentration as this is metric and rationally scaled.

**Table S18. LMM analysis results of the effect of human impact, vegetation type and the interaction between human impact and vegetation type on different carbon stocks.**

| Carbon stock<br>(transformation in<br>brackets) | Effect          | Estimate | Std. Error | df    | t value | Pr(> t ) |
|-------------------------------------------------|-----------------|----------|------------|-------|---------|----------|
| Soil Organic Carbon:<br>SOC                     | (Intercept)     | 15958.1  | 2746.12    | 6.05  | 5.811   | 0.0011   |
|                                                 | Human impact    | -1523.72 | 3077.28    | 32.67 | -0.495  | 0.6238   |
|                                                 | Vegetation type | 5235.45  | 2532.98    | 31.89 | 2.067   | 0.0469   |
|                                                 | Interaction     | -1563.3  | 3922.99    | 32.46 | -0.398  | 0.6929   |
| Root Carbon (sqrt)                              | (Intercept)     | 1.03251  | 0.13879    | 5.13  | 7.439   | <0.001   |
|                                                 | Human impact    | -0.2585  | 0.13765    | 32.48 | -1.878  | 0.069385 |
|                                                 | Vegetation type | -0.05646 | 0.1131     | 31.94 | -0.499  | 0.621062 |
|                                                 | Interaction     | -0.08001 | 0.17539    | 32.33 | -0.456  | 0.651299 |
| Tree Carbon (log10)                             | (Intercept)     | 2.4002   | 0.1944     | 1.24  | 12.349  | 0.03018  |
|                                                 | Human impact    | 0.434    | 0.1483     | 46    | 2.926   | 0.00531  |

If values were transformed prior to analysis, the type of transformation is shown in brackets alongside the name of the property. Our models used fixed effects (human impact + vegetation type + human impact x vegetation type) and random effects (sites 1–4 of the Cordillera Urubamba for 'SOC' and 'Root Carbon'; tree species, Cordillera, elevation for 'Tree Carbon').
